1  
2  
3  
4  
5  
6  
7  
8  
9  
10  
11  
12  
13  
14  
15  
16  
17  
18  
19  
20  
21  
22  
23  
24

**FMRP-Regulated RNA Splicing is Mediated by Multiple Splicing Factors and Translational Control of *Mbn11* RNA**

Suna Jung<sup>1</sup>, Sneha Shah<sup>1</sup>, and Joel D. Richter<sup>2</sup>

Program in Molecular Medicine

University of Massachusetts Chan Medical School

Worcester MA 01605 USA

<sup>1</sup>equal contributors

<sup>2</sup>corresponding author. [joel.richter@umassmed.edu](mailto:joel.richter@umassmed.edu)

Key words: FMRP, Fragile X Syndrome, Alternative splicing, MBNL1, PTBP1, hnRNPF, hnRNPQ

Running title: FMRP regulation of splicing

25  
26  
27  
28  
29  
30  
31  
32  
33  
34  
35  
36  
37  
38  
39  
40  
41  
42  
43  
44  
45

## Abstract

The neurodevelopmental disorder Fragile X Syndrome (FXS) is often modeled in *Fmr1* knockout mice, which results in the loss of the RNA binding protein FMRP. In the brain, FMRP stalls ribosomes on specific mRNAs including *Setd2*, whose encoded protein catalyzes the epigenetic mark H3K36me3. In the absence of FMRP, SETD2 levels are excessive, which alters the H3K36me3 landscape and secondarily, alternative pre-mRNA splicing. Here we show that in *Fmr1*-deficient mice, RNA mis-splicing occurs in several brain regions and peripheral tissues. To assess molecular mechanisms of splicing mis-regulation, we employed N2A cells depleted of *Fmr1*. In the absence of FMRP, RNA-specific exon skipping events are linked to the splicing factors hnRNP, hnRNPQ, PTPB1, and MBNL1. FMRP binds to *Mbnl1* mRNA and regulates its translation. In *Fmr1*-depleted cells, *Mbnl1* RNA itself is mis-spliced, which results in the loss of a nuclear localization signal (NLS)-containing exon that in turn alters the nucleus-to-cytoplasm ratio of MBNL1. This re-distribution of MBNL1 isoforms in *Fmr1*-deficient cells likely results in splicing changes in other RNAs. *Mbnl1* mis-splicing also occurs in human FXS post-mortem brain. These data link FMRP-dependant impaired translation of splicing factors, such as MBNL1, to altered self-splicing and subcellular localization of the *Mbnl1* RNA and protein. Altered expression of splicing factors in the absence of FMRP may cascade into the global dys-regulation of tissue specific splicing observed in *Fmr1* deficient cells.

46

## Introduction

47

48 Fragile X Syndrome (FXS) is a neuro-developmental disorder characterized by mild to severe  
49 intellectual disability, speech and developmental delays, social impairment, perseveration,  
50 aggression, anxiety, and other maladies. FXS lies on the autism spectrum and is the most  
51 common single gene cause of autism. FXS is caused by an expansion of 200 or more CGG triplets  
52 in the 5' untranslated region (UTR) of *FMR1*, which in turn induces DNA methylation and gene  
53 silencing. Loss of the *FMR1* gene product FMRP results in the disruption of neuronal circuitry and  
54 synaptic efficacy, which produces an array of neuro-pathological conditions (Santoro et al 2012;  
55 Hagerman et al 2017; Richter and Zhao 2021). FMRP, an RNA binding protein present in probably  
56 all cells is frequently studied in mouse hippocampus, where several studies show that it represses  
57 protein synthesis (Dölen et al 2007, Darnell et al 2011; Osterweil et al 2013, Udagawa et al 2013).  
58 This observation, in conjunction with results showing that FMRP co-sediments with polysomes in  
59 sucrose gradients (Feng et al 1997; Stefani et al 2004) and that it UV CLIPs (crosslink-  
60 immunoprecipitation) mostly to coding regions of mRNA (Darnell et al 2011; Maurin et al 2018;  
61 Sawicka et al 2019; Li et al 2020), suggested that it inhibits translation by impeding ribosome  
62 translocation. Indeed, it is now clear that at least one activity of FMRP is to stall ribosomes (Darnell  
63 2011; Udagawa et al 2013; El Fatimy et al 2016; Das Sharma et al 2019; Shah et al 2020). How  
64 this occurs is unclear, but it could involve codon bias or optimality (Shu et al 2020; Richter and  
65 Collier 2015), impairment of ribosome function (Chen et al 2014), or formation of translationally  
66 quiescent subcellular granules (El Fatimy et al 2016).

67

68 One group of FMRP target RNAs encodes chromatin modifying enzymes (Darnell et al 2011; Korb  
69 et al 2017; Hale et al 2021). The synthesis of several of these enzymes is inhibited by FMRP; in  
70 its absence, excessive levels of these chromatin proteins alter the epigenetic landscape, which in  
71 turn impairs cognitive function (Korb et al 2017). A few mRNAs encoding epigenetic factors

72 associate with FMRP-stalled ribosomes (Shah et al 2020). One of these, *Setd2*, encodes an  
73 enzyme that establishes the histone modification H3K36me3, which is most often located in gene  
74 bodies (Schwartz et al. 2009; Kolasinska-Zwierz et al 2009). In *Fmr1*-deficient mouse brain,  
75 SETD2 protein levels are elevated, which in turn alter the distribution of H3K36me3 chromatin  
76 marks. H3K36me3 has been linked to alternative pre-mRNA splicing (Kim et al 2011; Pradeepa  
77 et al 2012; Bhattacharya et al 2021), and indeed there is some correlation between the genes  
78 with recast H3K36me3 and altered splicing in *Fmr1*-deficient mouse hippocampus (Shah et al  
79 2020). The observation that *Fmr1*-deficiency results in hundreds of mis-splicing events prompted  
80 us to investigate both the prevalence and mechanism of FMRP-regulated nuclear pre-RNA  
81 processing.

82

83 We find that mis-splicing, mostly exon skipping, is widespread in *Fmr1*-deficient mice and occurs  
84 in all brain regions and peripheral tissues examined. To determine how FMRP might regulate  
85 splicing, we depleted *Fmr1* from mouse N2A cells, which resulted in hundreds of mis-splicing  
86 events. We focused on specific exons in three RNAs that are aberrantly skipped or included in  
87 *Fmr1*-deficient cells and mapped surrounding splicing factor consensus binding sites. Splicing  
88 factors MBNL1, PTBP1, and hnRNPF are responsible for altered splicing in *Fmr1*-deficient cells.  
89 FMRP binds to *Mbnl1* and *Ptbp1* mRNA and also regulates the translation of two of these factors,  
90 MBNL1 and hnRNPQ. Moreover, *Mbnl1* RNA itself undergoes alternative splicing, which is  
91 impaired in *Fmr1*-deficient cells. In the absence of FMRP, an NLS-containing exon is frequently  
92 skipped, which alters the nucleus-cytoplasm distribution of MBNL1. This change in subcellular  
93 localization of MBNL1 likely affects splicing decisions on other mRNAs. In addition, *Mbnl1* splicing  
94 is altered in human FXS post-mortem cortex, suggesting that it could modify the brain proteome  
95 and thereby contribute to intellectual impairment and Fragile X Syndrome.

96

97  
98  
99  
100  
101  
102  
103  
104  
105  
106  
107  
108  
109  
110  
111  
112  
113  
114  
115  
116  
117  
118  
119  
120  
121  
122

## Results

### RNA splicing mis-regulation in *Fmr1* KO brain

Gene expression and RNA splicing are mis-regulated in the *Fmr1*-deficient mouse hippocampus (Shah et al 2020). To determine whether this mis-regulation occurs in other brain regions and in peripheral tissues, we sequenced RNA from (n=3, 2-3 month old) WT and *Fmr1* KO hippocampus, cerebellum, and cortex, as well as liver, muscle, and testis (**Figure 1A**). Volcano plots show that hundreds of RNAs are up or down-regulated in *Fmr1* KO cortex although fewer RNAs were similarly mis-regulated in hippocampus and cerebellum (log<sub>2</sub>FC, FDR < 0.05, n=3) (**Figure 1B; Supplementary file 1**). A Venn diagram shows that a significant group of RNAs, mostly encoding proteins involved in synapse or cell junction formation, was shared between hippocampus and cortex (**Figure 1C**). In the cortex, many upregulated RNAs encode proteins involved in RNA processing for biogenesis, while down regulated RNAs code for proteins mediating membrane potential and synapse organization (**Figure 1D**). Analysis of these RNA seq datasets demonstrates that hundreds of RNAs are mis-spliced, mostly exon skipping, in the *Fmr1*-deficient hippocampus, cortex, and cerebellum (log<sub>2</sub>FC, FDR < 0.05, Percent spliced-in [PSI] > 0.05, n=3) (**Figure 1E; Supplementary file 2-4**). For the hippocampus and cortex, the percent of exons spliced in has a median of about 20% (**Figure 1F**). In the cortex and hippocampus, RNAs displaying differential exon skipping between the two genotypes encode proteins involved in synapse organization and development and JNK signaling, respectively (**Figure 1- figure supplement 1A**). **Figure 1G** shows RT-PCR confirmation of exon 6 skipping of Defective in Cullin Neddylation 1d2 (*Dcun1d2*) RNA. In both brain regions there was a > 2-fold increase in exon 6 skipping upon *Fmr1* deficiency compared to wild type (WT). Similar levels of the *Dcun1d2* constitutive exon 2 served as an internal control suggesting no change in *Dcun1d2* total RNA levels in the *Fmr1* KO tissues.

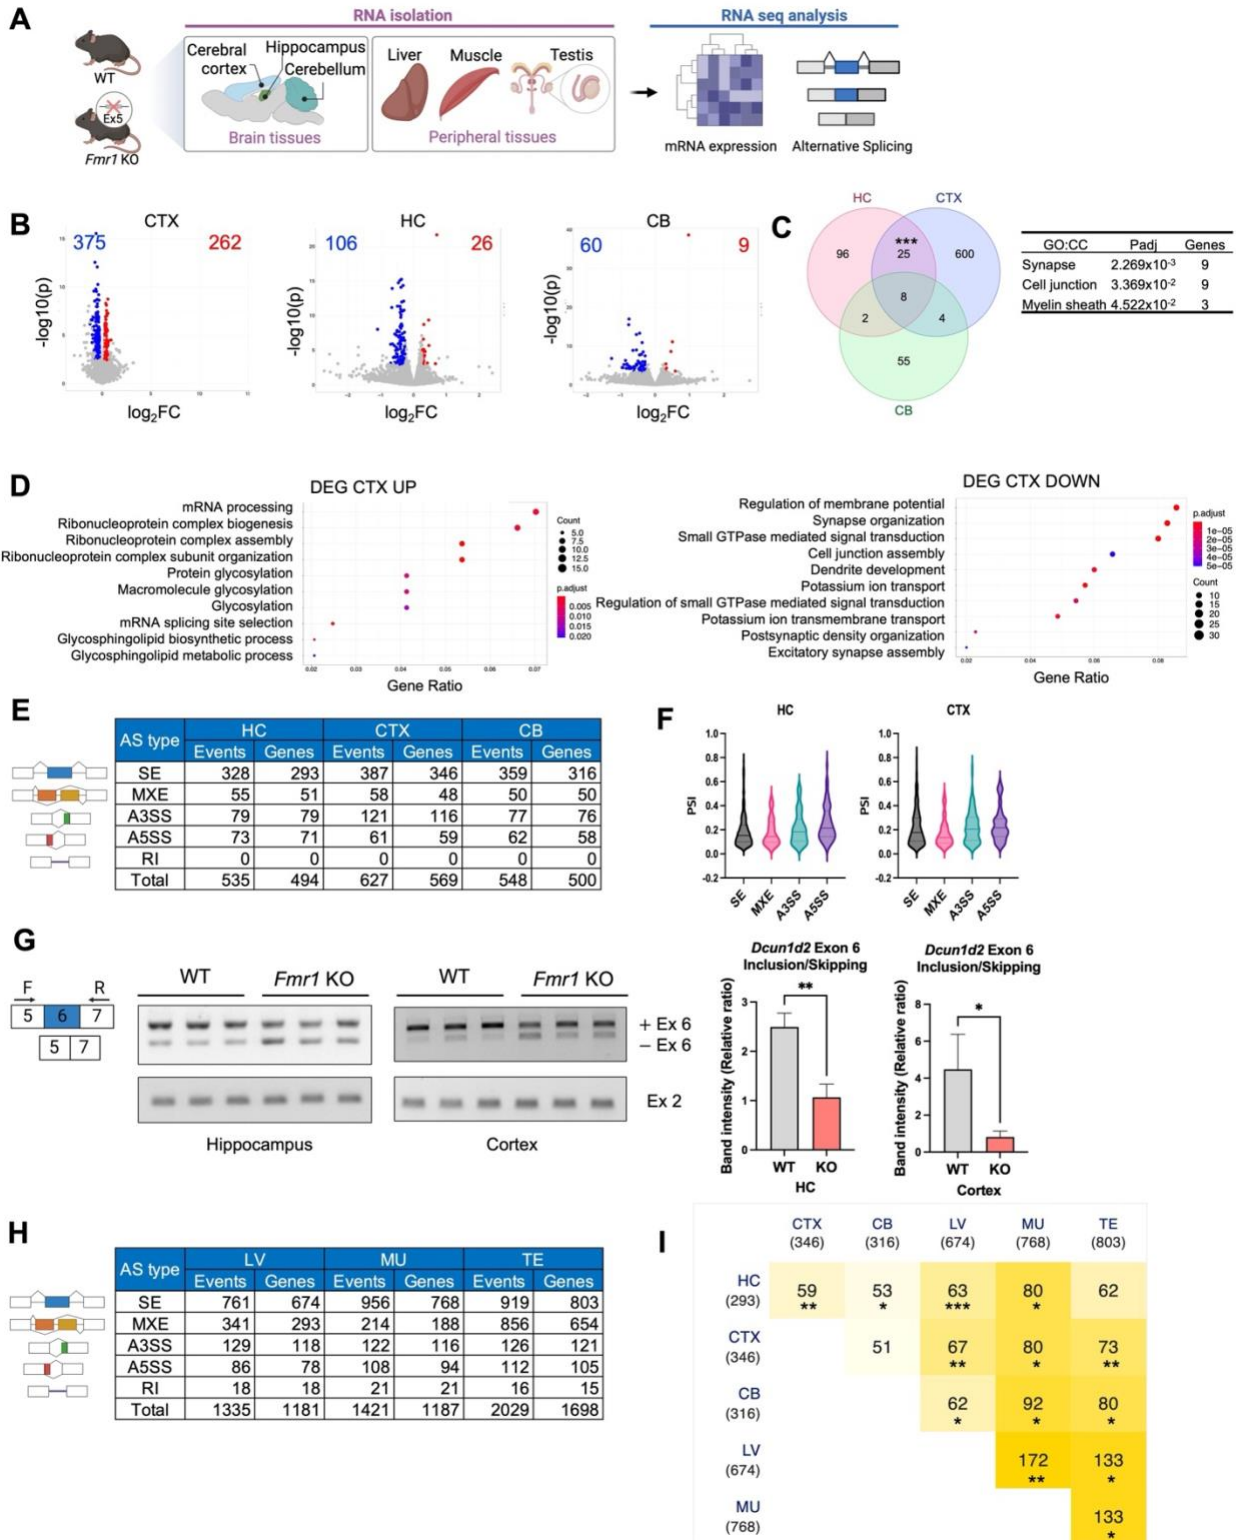

123

124 **Figure 1.** Differential gene expression in *Fmr1*-deficient brain and peripheral tissues.

125 (A) Schematic of analysis. Created with BioRender.com.

126 (B) Volcano plots of differential gene expression comparing WT and *Fmr1*-deficient cortex (CTX),  
127 hippocampus, HC), and cerebellum (CB). The numbers refer to those RNAs that are up or down-  
128 regulated between the two genotypes (n=3, FDR < 0.05).

129 (C) Venn diagram comparing differential RNA levels from WT and *Fmr1* KO hippocampus, cortex,  
130 and cerebellum (hypergeometric test, \*\*\*p < 0.001). GO terms for cellular components and p-  
131 value for overlapped RNAs are indicated.

132 (D) GO terms for RNAs that are significantly up or down regulated in the cortex.

133 (E) Changes in alternative RNA splicing (SE, skipped exons; MXE, mutually exclusive exons;  
134 A3SS, alternative 3' splice site; A5SS, alternative 5' splice site; RI, retained intron) in *Fmr1* KO  
135 HC, CTX, or CB relative to WT (log2FC, p < 0.05, n=3).

136 (F) Percent spliced in (PSI) distribution for HC and CTX. The solid line is the median and the  
137 dashed lines are quartiles. p-value < 0.05, PSI > 0.05.

138 (G) RT-PCR validation of altered *Dcun1d2* exon 6 inclusion/skipping in *Fmr1* KO HC and CTX.  
139 *Dcun1d2* constitutive Exon 2 was amplified to compare total mRNA levels between the genotypes  
140 and mean ± S.D is shown (Student's t-test, \*p < 0.05, \*\*p < 0.01).

141 (H) Changes in alternative RNA splicing events (SE, skipped exons; MXE, mutually exclusive  
142 exons; A3SS, alternative 3' splice site; A5SS, alternative 5' splice site; RI, retained intron) in *Fmr1*  
143 KO liver (LV), muscle (MU), and testis (TE) relative to WT (PSI > 0.05, p < 0.05, n=3).

144 (I) Comparison of all exon skipping changes in *Fmr1* brain regions and peripheral tissues relative  
145 to WT (hypergeometric test, \*p < 0.05; \*\*p < 0.01; \*\*\*p < 0.001).

146

### 147 **Aberrant RNA splicing in *Fmr1* KO peripheral tissues**

148 Because FMRP is expressed in probably all tissues, we examined RNA splicing in WT and *Fmr1*  
149 deficient liver, muscle (gastrocnemius), and testis. As with the brain, hundreds of RNAs are up or  
150 down regulated in FMRP KO peripheral tissues relative to WT (FDR, p < 0.05, n=3) (**Figure 1-**  
151 **figure supplement 1B; Supplementary file 1**), which may be somewhat surprising because



152 relative *Fmr1* levels (in transcripts per million, TPM) in these tissues are about one-tenth the  
153 amount in the brain (**Figure 1-figure supplement 1C**). In the liver, RNAs that are up or down  
154 regulated in FMRP KO relative to WT encode factors involved in various metabolic processes and  
155 catabolic and phosphorylation events, respectively (**Figure 1-figure supplement 1D**). In muscle,  
156 up or down regulated RNAs encode factors involved in extra cellular matrix organization and  
157 mitochondrial function, respectively (**Figure 1-figure supplement 1E**). In testis, up or down  
158 regulated RNAs encode factors involved in cell division, and reproductive system development,  
159 respectively (**Figure 1-figure supplement 1F**).

160

161 In FMRP KO peripheral tissues, splicing mis-regulation is widespread, as in the brain mostly  
162 skipped exons but a large number of mutually exclusive exons as well ( $\log_2FC$   $p < 0.05$ ,  $PSI >$   
163  $0.05$ ,  $n=3$ ) (**Figure 1H; Supplementary file 5-7**). In the liver and muscle, RNAs with differential  
164 exon skipping between the two genotypes encode chromatin modifying enzymes and Wnt  
165 signaling components, respectively (**Figure 1-figure supplement 1G**). Comparison of the RNAs  
166 from all brain regions and peripheral tissues that display significantly different exon skipping  
167 between the two genotypes shows a remarkable degree of overlap (**Figure 1I**). For example,  
168 nearly 20% of RNAs with skipped exons in hippocampus are the same as in cortex, which might  
169 be expected. However, ~10% of RNAs with skipped exons in the liver also exhibit exon skipping  
170 in the hippocampus. In this same vein, ~9% of RNAs with skipped exons in the testis also show  
171 exon skipping in the cortex. These data indicate that if FMRP regulates exon skipping in one type  
172 of tissue (e.g., the brain), it is likely to do so in another tissue (e.g., liver).



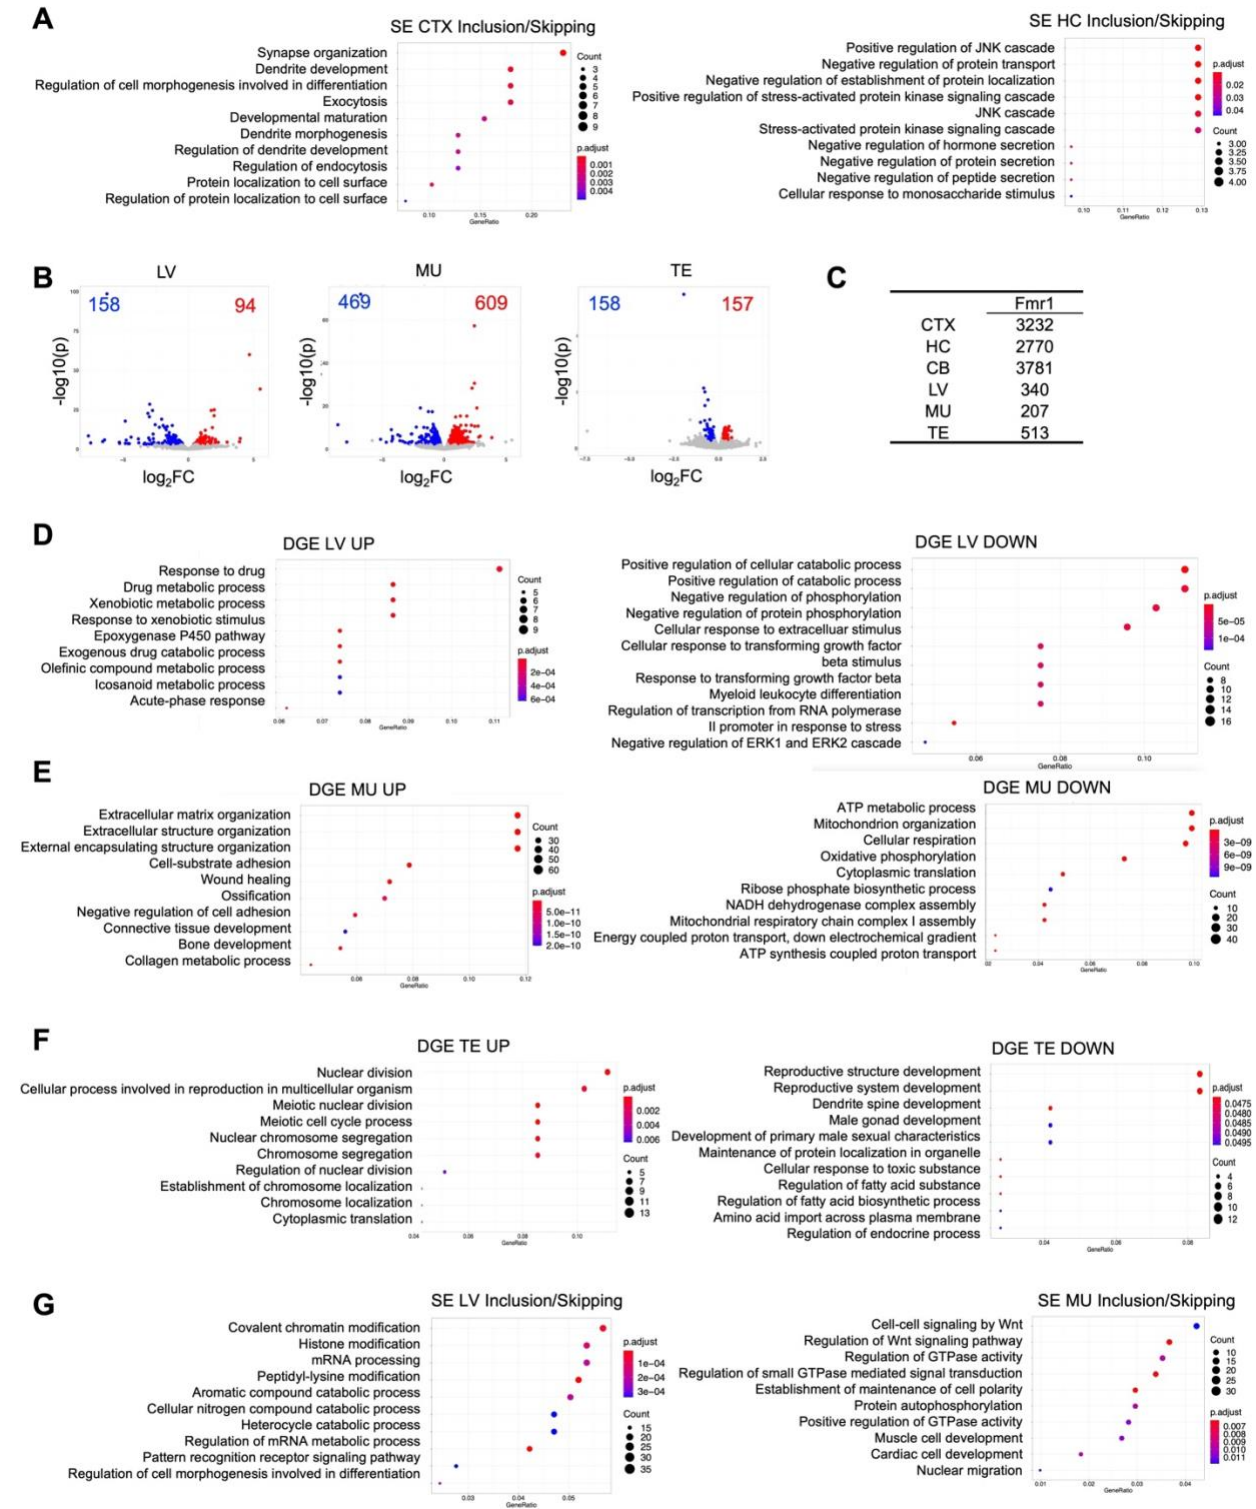

173

174 **Figure 1 – figure supplement 1. Gene Ontology (GO) terms.**

175 (A) GO terms for skipped/included exons in *Fmr1* KO CTX and HC.

176 (B) Volcano plots of RNAs up or down regulated ( $\log_2FC$ ,  $FDR < 0.05$ ,  $n=3$ ) in *Fmr1* KO liver (LV),  
177 muscle (MU), and testis (TE).

178 (C) *Fmr1* RNA levels (TPM) in brain regions and peripheral tissues.

179 (D-F) GO terms of RNAs up or down regulated in *Fmr1* KO liver, muscle, and testis,

180 (G) GO terms for skipped/included exons in *Fmr1* KO liver and muscle.

181

## 182 **FMRP-regulated splicing in N2A cells**

183 To investigate the mechanism of FMRP-mediated splicing, we surmised that using a single cell  
184 type would be a more efficacious approach compared to a tissue containing multiple cell types.

185 Consequently, we used mouse N2A neuroblastoma cells depleted of *Fmr1* by an siRNA  
186 complementary to this RNA's 3'UTR, which reduced FMRP levels by  $> 95\%$  compared to a

187 nontargeting (NT) control (**Figure 2A**). We next performed RNA-seq from cells transfected with

188 either the nontargeting or *Fmr1* targeting siRNAs. **Figure 2B** and **Figure 2 - figure supplement**

189 **1A** shows that there were  $\sim 2000$  RNAs that were mis-spliced ( $\log_2FC$ ,  $p < 0.05$ ,  $PSI > 0.05$ ,

190 **Supplementary file 8**). Several of these mis-splicing events were validated by RT-PCR: *Mapt*

191 (microtubule associated protein tau) exon 4, *Tnik* (TRAF2 and NCK interacting kinase) exon 21,

192 and *Wnk1* (WNK Lysine Deficient Protein Kinase 1) exon 11 were all included more in *Fmr1*

193 depleted cells compared to nondepleted cells while *App* (amyloid precursor protein) exon 8, *Ski*

194 (SKI protooncogene) exon 2, and *Os9* (Osteosarcoma Amplified 9, endoplasmic reticulum lectin)

195 exon 13 were all skipped in *Fmr1*-depleted cells relative to non-depleted cells (**Figure 2C**).

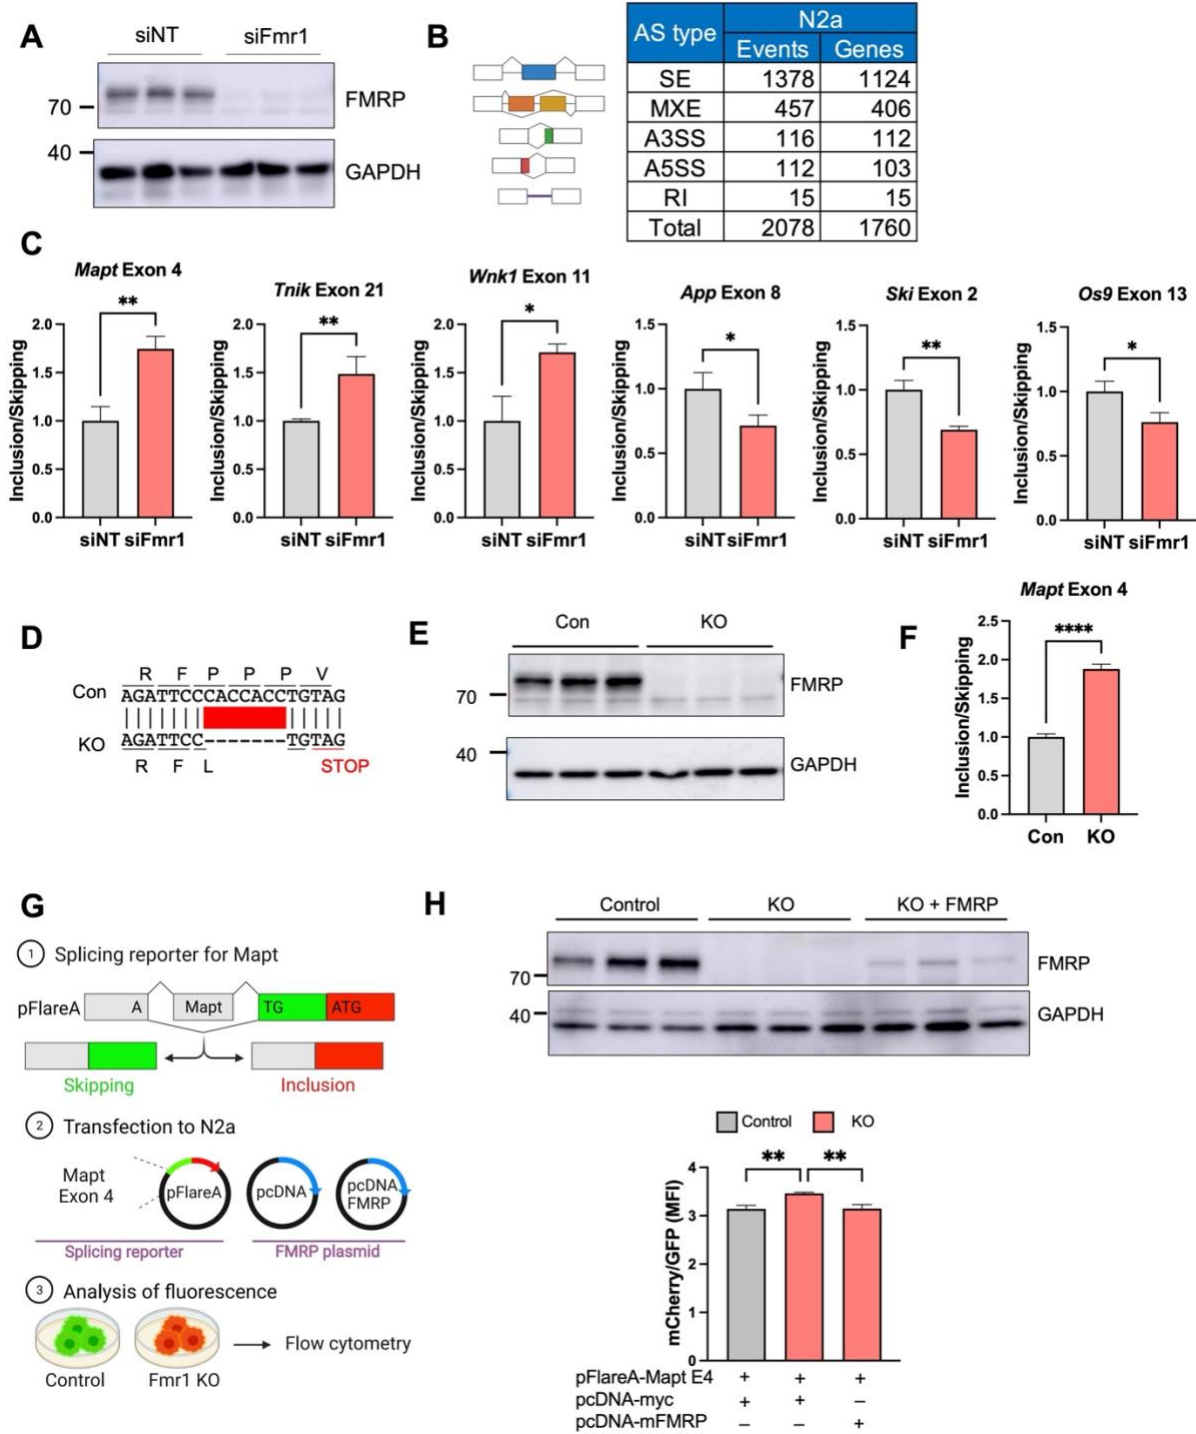

196

197 **Figure 2.** Mis-regulated splicing in *Fmr1*-deficient mouse N2A neuroblastoma cells.

198 (A) Western blots showing depletion of FMRP following siRNA knockdown of *Fmr1*. GAPDH

199 serves as a loading control. siNT refers to a nontargeting siRNA control.

200 (B) Types of mis-splicing events and the number of genes affected in *Fmr1*-depleted N2A cells  
201 (PSI > 0.05;  $p < 0.05$ ;  $n=2$  for siNT,  $n=3$  for siFmr1).

202 (C) qPCR validation of mis-splicing events (exons skipped or included) in six RNAs in *Fmr1*-  
203 depleted cells compared to siNT control (Student's t-test,  $n=3$ : \* $p < 0.05$ ; \*\* $p < 0.01$ ). Mean  $\pm$  S.D  
204 is shown.

205 (D) CRISPR/Cas9-edited portion of *Fmr1*, which deletes seven nucleotides leading to a frame-  
206 shift and nonsense-mediated RNA decay.

207 (E) Western blot of FMRP in control and *Fmr1*-edited cells.

208 (F) qPCR of *Mapt* exon 4 skipping/inclusion in *Fmr1*-edited cells compared to control and mean  
209  $\pm$  S.D is shown (Student's t-test, \*\*\*\* $p < 0.0001$ ).

210 (G) pFlare system for assessing exon skipping and inclusion. *Mapt* exon 4 was inserted into  
211 pFlareA. When the exon is skipped, GFP is expressed; when the exon is included, RFP is  
212 expressed. This plasmid, as well as an empty pcDNA plasmid or one that expresses mouse  
213 FMRP, was transfected into control or *Fmr1* KO N2A cells. The cells were then analyzed by flow  
214 cytometry. Created with BioRender.com.

215 (H) Western blot of FMRP from control cells, CRISPR/Cas9-edited cells transduced with empty  
216 pcDNA, and CRISPR/Cas9-edited cells transduced with pcDNA FMRP. The histogram quantifies  
217 the ratio of cells expressing GFP or mCherry and mean  $\pm$  S.D is shown (one-way ANOVA, \*\* $p <$   
218  $0.05$ ,  $n=3$ ).

219

## 220 **Rescue of mis-regulated splicing by FMRP replacement**

221 To confirm FMRP control of splicing by an entirely different method, we used CRISPR/Cas9 gene  
222 editing to delete 7 nucleotides from exon 3 of *Fmr1*, which causes a reading frame shift to a stop  
223 codon resulting in nonsense mediated mRNA decay (**Figure 2D**; **Figure 2 - figure supplement**  
224 **1B**) and a complete loss of FMRP (**Figure 2E**). In these KO cells, loss of *Mapt* exon 4 skipping  
225 was nearly identical as observed with siFmr1 knockdown of *Fmr1* (**Figure 2F**). We next generated

226 a reporter construct where *Mapt* exon 4 and its flanking intron sequences were inserted into the  
227 pFlareA plasmid, which contains GFP and RFP sequences. Here, if *Mapt* exon 4 is included, an  
228 A nucleotide will generate a start codon when juxtaposed to a TG dinucleotide following splicing  
229 to the RFP reading frame and will express RFP. If *Mapt* exon 4 is skipped, GFP will be expressed  
230 **(Figure 2G)**. This plasmid, together with an FMRP-expressing plasmid or an empty control  
231 plasmid, were transfected into normal or *Fmr1* KO N2A cells and green/red fluorescence intensity  
232 was analyzed by flow cytometry **(Figure 2G)**. The western blot in **Figure 2H** shows the expression  
233 level of FMRP relative to GAPDH. The “rescuing” ectopic FMRP was expressed at ~10% of  
234 endogenous FMRP levels. In the FMRP KO cells, *Mapt* exon 4 in the reporter was more included  
235 relative to that observed in control cells, which replicates the data with endogenous *Mapt* exon 4  
236 with both siFmr1 depletion **(Figure 2C)** and CRISPR/Cas9-edited *Fmr1* KO cells **(Figure 2F)**,  
237 albeit not to the same extent. Importantly, ectopic expression of FMRP in the KO cells restored  
238 *Mapt* exon 4 inclusion to control cells levels, demonstrating the reversibility of the exon skipping  
239 that is FMRP-dependent.



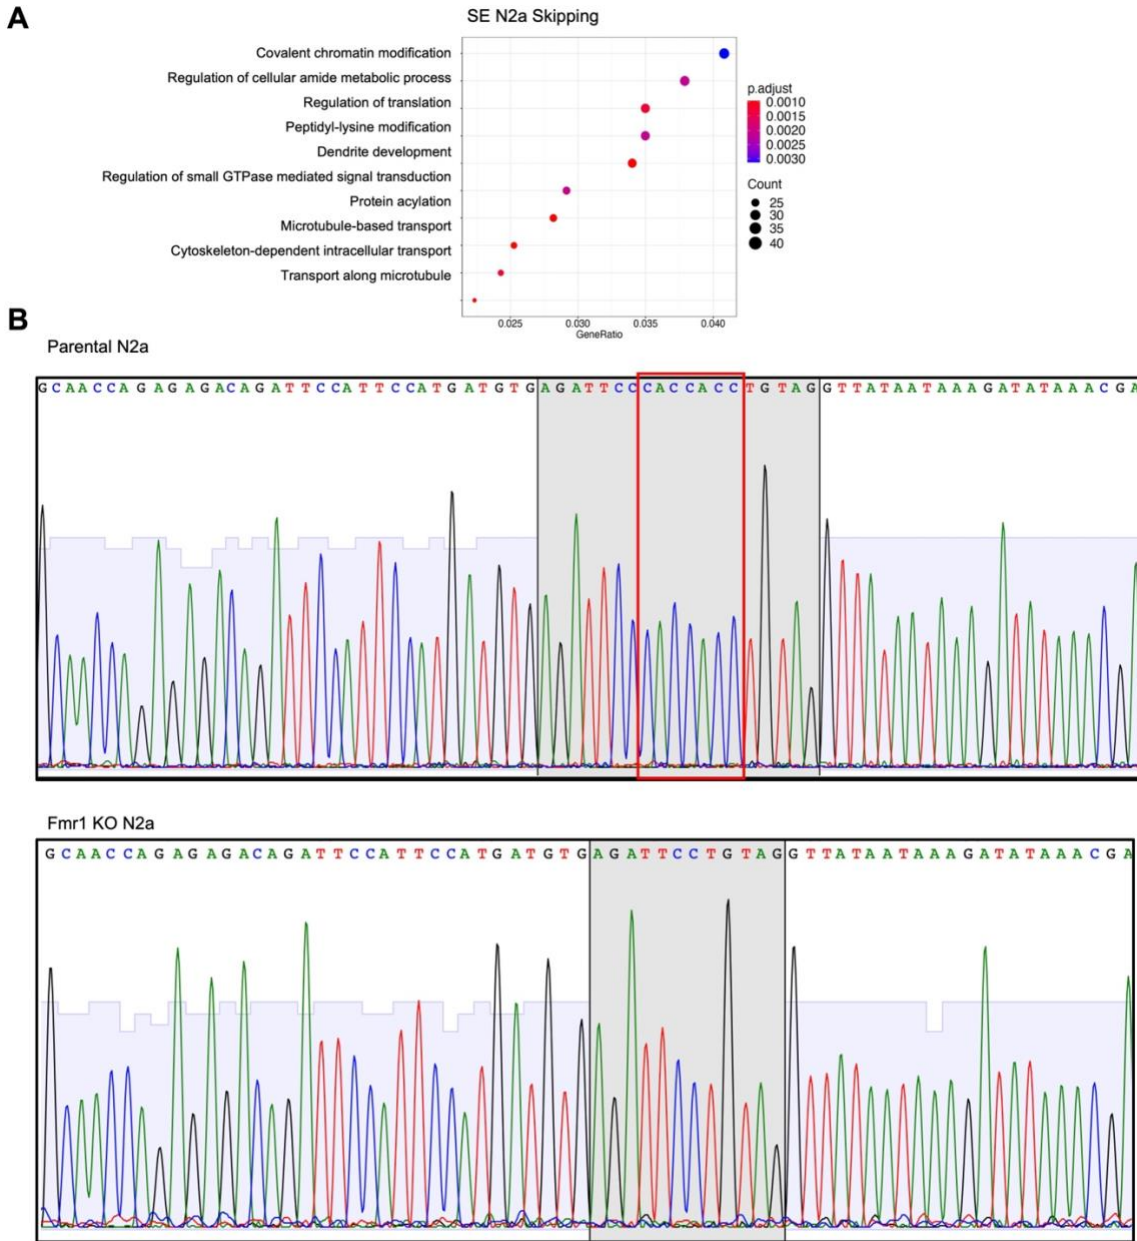

240

241 **Figure 2 – figure supplement 1.**

242 (A) GO terms for RNAs that display exon skipping in *Fmr1*-depleted N2A cells.

243 (B) DNA sequence analysis of parental N2A cells (top) and *Fmr1*-depleted cells (bottom). The

244 shaded portion corresponds the amino acid sequences shown in **Figure 2**. The red box indicates

245 the nucleotides depleted by CRISPR/Cas9 editing. Following editing, the TAG at the right of the

246 shaded box becomes a premature stop codon, leading to nonsense mediated mRNA decay and

247 loss of FMRP expression.

248 **FMRP regulation of splicing factor activity**

249 To identify splicing factors that might be regulated by FMRP, we focused on exons in three RNAs  
250 that are skipped or included in *Fmr1*-deficient cells and used the SFMap database (Akerman et  
251 al 2009) to identify potential splicing factor binding sites. *Mapt* exon 4, which is more included in  
252 *Fmr1*-deficient cells relative to control cells, is flanked by binding sites for splicing factors MBNL1,  
253 PTBP1, hnRNPF, and hnRNPQ (**Figure 3A**). We depleted the RNAs encoding each of these  
254 splicing factors as well as *Fmr1* (**Figure 3- figure supplement 1A-H**). Depletion of *Mbnl1*  
255 resulted inclusion of exon 4 even more so compared to *Fmr1* depletion. A double depletion of  
256 both *Mbnl1* and *Fmr1* caused even greater exon inclusion than the single depletions (**Figure 3B**).  
257 Constitutive *Mapt4* exon 15 was unaffected by these depletions (**Figure 3- figure supplement**  
258 **1I**). Depletion of *Ptbp1* also resulted in a greater inclusion of *Mapt* exon 4 than *Fmr1* depletion. A  
259 double *Fmr1/Ptbp1* depletion was similar to *Fmr1* depletion alone (**Figure 3B; Figure 3- figure**  
260 **supplement 1J**). Depletion of hnRNPF or hnRNPQ had no effect on *Mapt* exon 4  
261 skipping/inclusion (**Figure 3B; Figure 3B, Figure 3- figure supplement 1K,L**). Because the  
262 magnitude of *Mapt* exon 4 inclusion was additive when both *Mbnl1* and *Fmr1* were depleted, we  
263 surmise that a second splicing factor under the control of FMRP is involved in this splicing event.



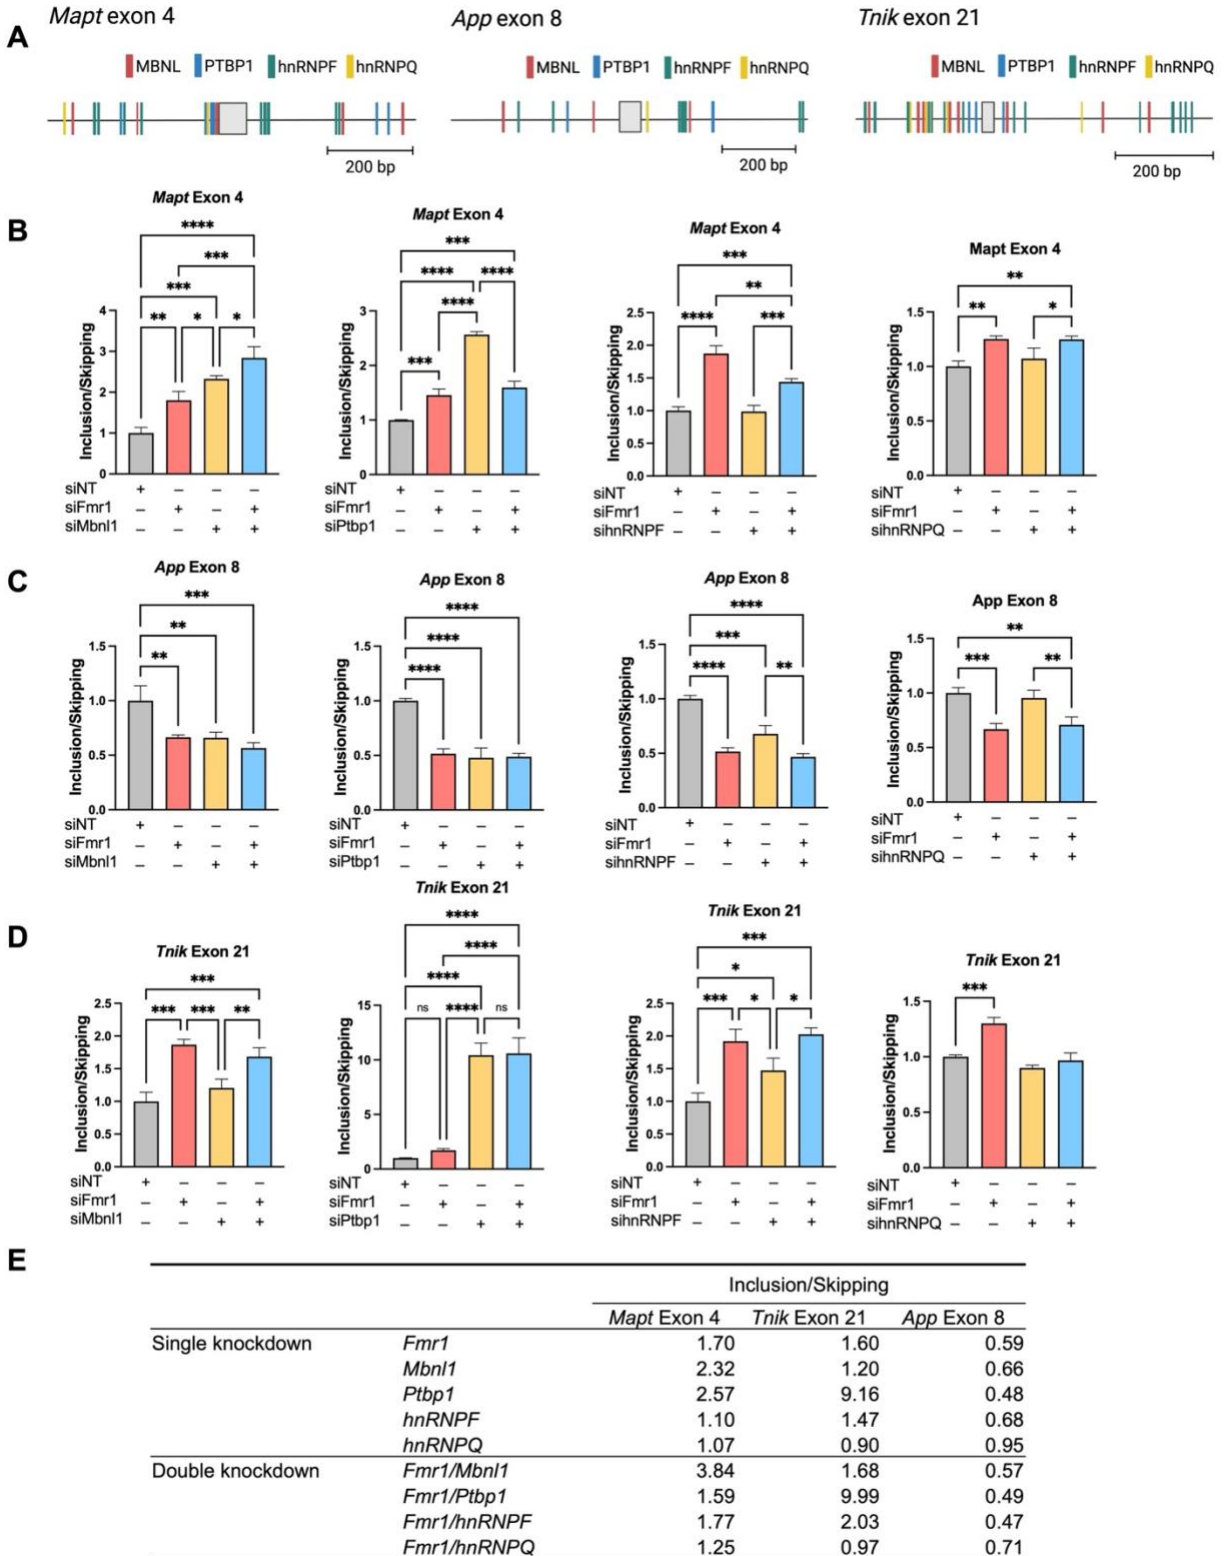

264

265 **Figure 3.** RNA binding proteins control specific splicing events in *Fmr1*-depleted N2A cells.

266 (A) Consensus binding motifs of hnRNPF, hnRNPQ, MBNL1, and PTPBP1 flanking skipped or  
267 included exons of *Mapt* (exon 4), *App* (exon 8), and *Tnik* (exon21) RNAs. Created with SFmap  
268 and Biorender.com.

269 (B) FMRP-dependent MBNL1, PTBP1, hnRNPF, and hnRNPQ-regulated splicing of *Mapt* exon  
270 4. All RT-PCR determinations were made relative to GAPDH or actin (relative expression) and  
271 were performed in triplicate. P-value were calculated using one-way ANOVA and mean  $\pm$  S.D is  
272 shown. \*p < 0.05; \*\*p < 0.01; \*\*\*p < 0.001; \*\*\*\*p < 0.0001.

273 (C) FMRP-dependent MBNL1, PTBP1, hnRNPF, and hnRNPQ-regulated splicing of *App* exon 8.  
274 All RT-PCR determinations were made relative to GAPDH or actin (relative expression) and were  
275 performed in triplicate. P-value were calculated using one-way ANOVA and mean  $\pm$  S.D is shown.  
276 \*p < 0.05; \*\*p < 0.01; \*\*\*p < 0.001; \*\*\*\*p < 0.0001.

277 (D) FMRP-dependent MBNL1, PTBP1, hnRNPF, and hnRNPQ-regulated splicing of *Tnik* exon  
278 21. All RT-qPCR determinations were made relative to GAPDH or actin (relative expression) and  
279 were performed in triplicate. P-value were calculated using one-way ANOVA and mean  $\pm$  S.D is  
280 shown. \*p < 0.05; \*\*p < 0.01; \*\*\*p < 0.001; \*\*\*\*p < 0.0001.

281 (E) Summary of exon inclusion/skipping following *Fmr1* and/or splicing factor depletion from N2A  
282 cells.

283

284 We next examined *App* exon 8, which is also flanked by MBNL1, PTBP1, hnRNPF, and hnRNPQ  
285 binding sites, is skipped more frequently upon *Fmr1* depletion compared to control. *Mbnl1*  
286 depletion caused *App* exon 8 skipping at the same frequency as *Fmr1* depletion. A double  
287 depletion of *Mbnl1* and *Fmr1* was not additive for exon 8 skipping (**Figure 3C**). Depletion of  
288 *hnRNPF*, however, caused increased skipping of *App* exon 8 similar to that observed when *Fmr1*  
289 was depleted. A double depletion was not additive for exon skipping. *hnRNPQ* depletion did not  
290 result in any change in *App* exon 8 skipping. Depletion of these factors had little effect on  
291 skipping/inclusion of constitutive *App* exon 2 (**Figure 3- figure supplement 1Q-T**).

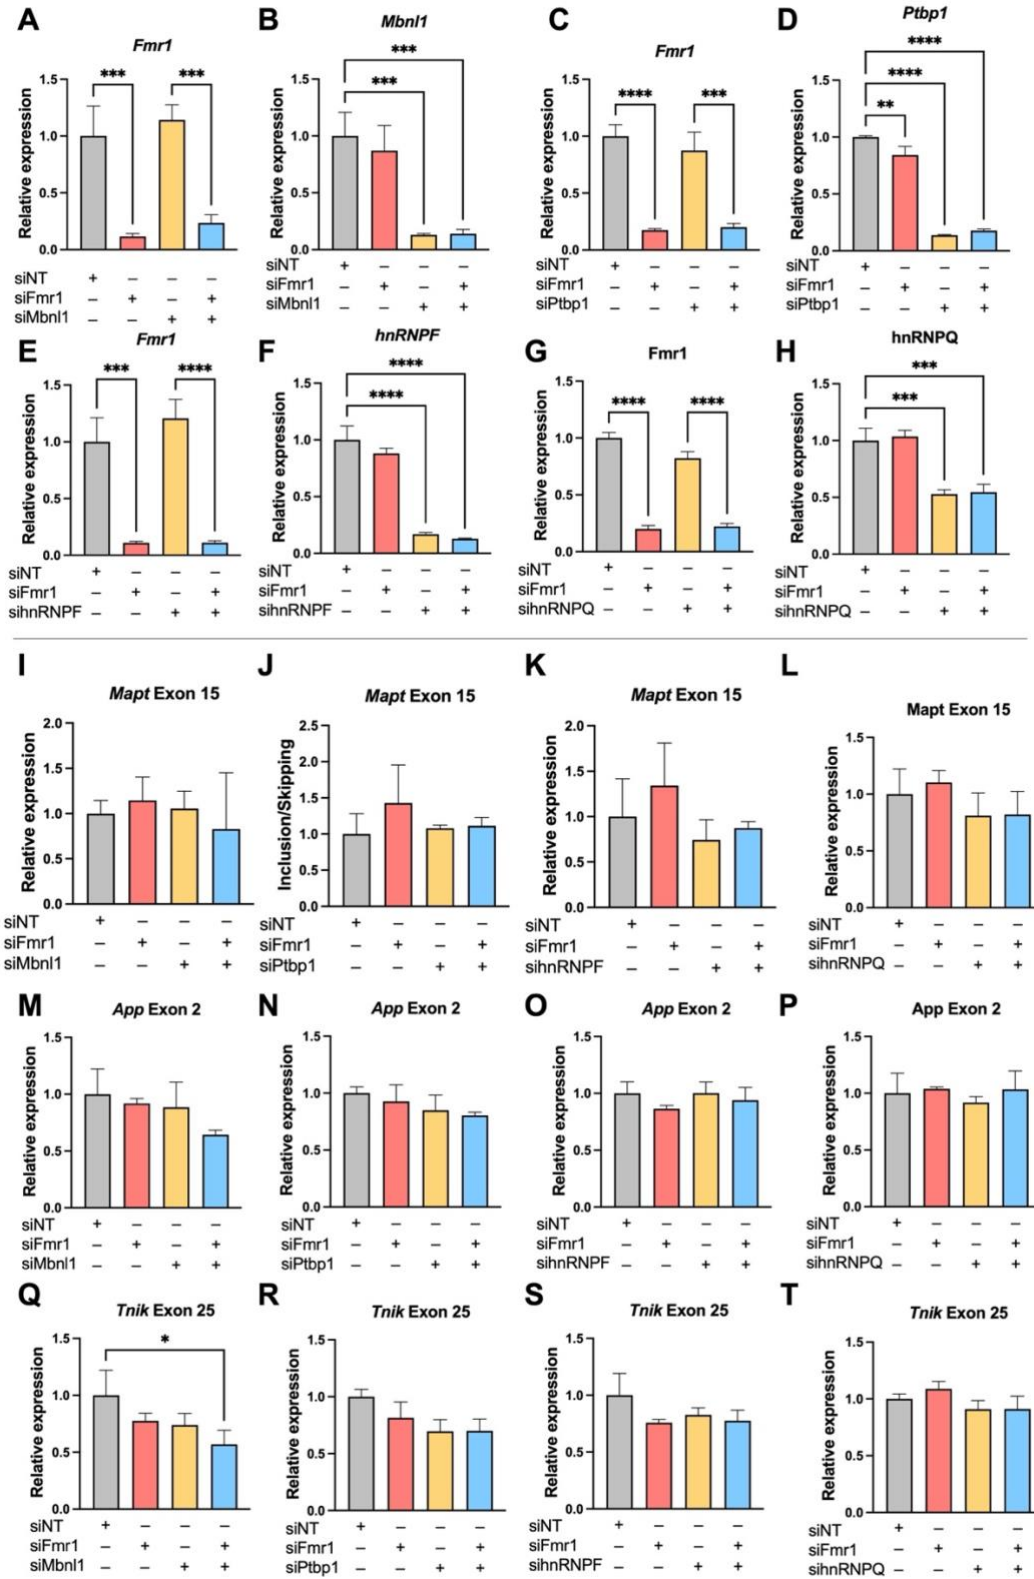

292

293 **Figure 3 – figure supplement 1.** Efficacy of splicing factor depletion and determination of

294 skipping of control exons.

295 (A-H) Efficacy of *Fmr1* and splicing factor depletion by siRNAs. \*p < 0.05; \*\*p < 0.01; \*\*\*p < 0.001;  
296 \*\*\*\*p < 0.0001 (n=3).

297 (I-T) Determination of skipping of constitutive exons *Mapt* exon 15, *App* exon 2, and *Tnik* exon 25  
298 following *Fmr1* and splicing factor depletion. \*p < 0.05; \*\*p < 0.01 (n=3).

299

300 Finally, we examined *Tnik* exon 21, which is flanked by the same splicing factor binding sites, was  
301 included more frequently when *Fmr1* is depleted (**Figure 3D**). While *Mbnl1* depletion had no effect  
302 on *Tnik* exon 21 skipping/inclusion, depletion of both *Ptbp1* and *hnRNPF* caused greater inclusion  
303 relative to controls (**Figure 3D**). Depletion of these factors had little effect on *Tnik* constitutive  
304 exon 25 (**Figure 3- figure supplement 1Q-T**). A summary of all these data demonstrates that  
305 FMRP regulation of certain splicing factors influences inclusion or skipping of specific exons  
306 (**Figure 3E**).

307

### 308 **FMRP regulates *Mbnl1* RNA translation and self-splicing**

309 To determine whether FMRP might regulate splicing factor expression directly, we first performed  
310 RNA co-immunoprecipitation experiments followed by RT-PCR for splicing factor RNAs. **Figure**  
311 **4A** demonstrates that FMRP co-immunoprecipitated *Mbnl1* and *Ptbp1* RNAs relative to an IgG  
312 control. For comparison, Maurin et al (2018) demonstrated that mouse brain FMRP UV-CLIPs to  
313 *Mbnl1* RNA. For comparison, Maurin et al (2018) demonstrated that mouse brain FMRP UV-  
314 CLIPs to *Mbnl1* RNA. We further found that around 50% of skipped or included exons in N2A  
315 cells contain binding sites for MBNL1 (**Supplementary file 9**) using RBPmap (Paz et al 2014).

316

317 Western blotting of the splicing factors showed that MBNL1 and hnRNPQ were elevated ~1.5-2  
318 fold upon *Fmr1*-depletion (**Figure 4B**). Because neither *Mbnl1* nor *hnRNPQ* RNAs are altered by  
319 *Fmr1* depletion (**Figure 3- figure supplement 1B and 1H**), we infer that these two RNAs are  
320 under negative translational control by FMRP. Furthermore, MBNL1 and hnRNPQ each display

321 two isoforms; in the case of MBNL1, the slow migrating isoform is reduced when *Fmr1* is depleted  
322 while the fast migrating form is increased (**Figure 4B**). For hnRNPQ, the slow migrating isoform  
323 is unaffected while the fast migrating isoform is increased upon *Fmr1* depletion (**Figure 4B**).  
324 Neither PTBP1 nor hnRNPF undergo abundance changes in *Fmr1*-depleted cells (**Figure 4B and**  
325 **Figure 4- figure supplement 1D and 1F**).

326 Two of the most frequently alternatively spliced exons of *Mbnl1* mRNA are exon 5 and exon 7  
327 (**Figure 4C**), of which exon5 skipping arises by autoregulated splicing (Terenzi and Ladd 2010;  
328 Gates et al 2011; Tran et al 2011) .To determine whether alternative *Mbnl1* auto-splicing is under  
329 FMRP control and involves either of these two exons, we performed RT-PCR with primers that  
330 distinguish between these exons. **Figure 4D** shows that exon 5 is skipped more frequently upon  
331 *Fmr1* depletion while exon 7 and exon 10 (constitutive exon) skipping is unaffected.

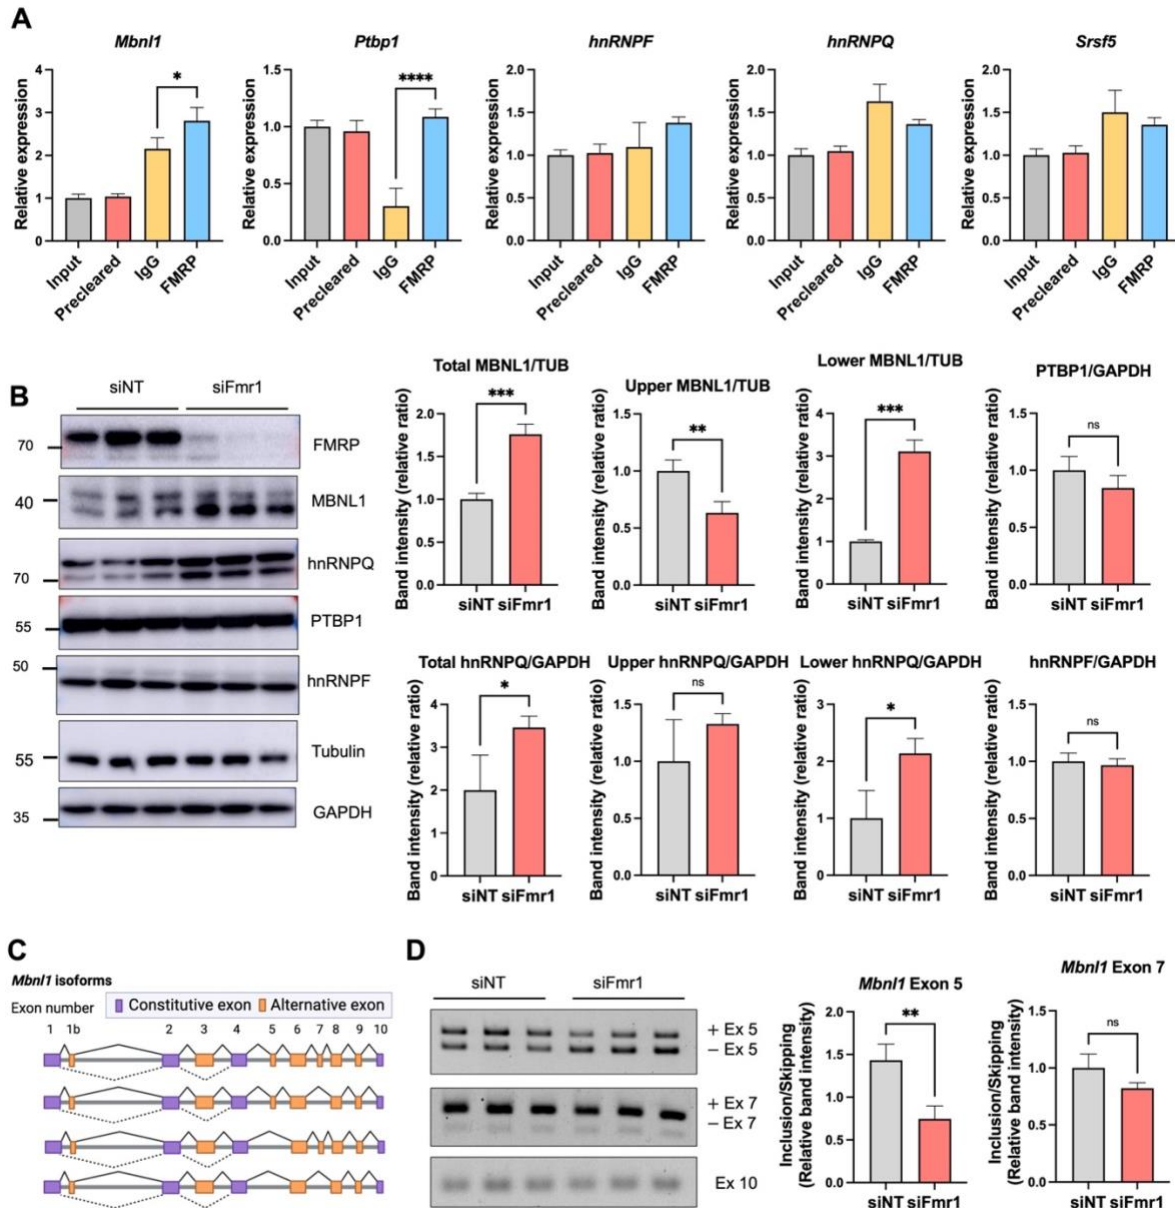

332

333 **Figure 4.** FMRP regulation of *Mbn1* RNA translation and isoform switching.

334 (A) Co-immunoprecipitation of *Mbn1*, *Ptpb1*, *hnRNPF*, *hnRNPQ*, and *Srsf5* RNAs with FMRP.

335 IgG and *Srsf5* RNA served as a immunoprecipitation controls. All experiments were performed in

336 triplicate. P-value were calculated using one-way ANOVA and mean  $\pm$  S.D is shown. \* $p < 0.05$ ;

337 \*\*\*\* $p < 0.0001$ .



338 (B) Western blotting and quantification of splicing factors from control and *Fmr1*-depleted cells.  
339 Histogram represents band intensity quantification and mean  $\pm$  S.D is shown (Student's t-test, \*p  
340 < 0.05, \*\*p < 0.01, \*\*\*p < 0.0001).

341 (C) Schematic of *Mbnl1* isoforms. Exons 5 and 7 are the most frequently alternatively spliced  
342 exons. Created with Biorender.com.

343 (D) RT-PCR of *Mbnl1* isoforms from control and *Fmr1*-depleted cell. At right is quantification of  
344 band intensities of exons 5 and 7 and mean  $\pm$  S.D is shown (Student's t-test, \*\*p < 0.01). The  
345 constitutive exon 10 was amplified to compare total *Mbnl1* RNA expression between the  
346 genotypes.

347

348 Exon 5, which contains a nuclear localization signal (NLS), determines whether MBNL1 is  
349 predominantly nuclear or is distributed to both nucleus and cytoplasm (Tran et al 2011; Kino et al  
350 2015). To assess whether exon 5 skipping upon *Fmr1* depletion alters the nucleus/cytoplasmic  
351 ratio of MBNL1, we first performed western blots of protein from cells fractionated into these two  
352 compartments. **Figure 5A** shows that MBNL1 containing the NLS encoded by exon 5 (i.e., the  
353 upper band) decreased in the cytoplasm following *Fmr1* depletion. Conversely, the NLS-lacking  
354 MBNL1 (lower band) increased in the cytoplasm when *Fmr1* was depleted. The upper NLS-  
355 containing band was decreased in the nucleus after *Fmr1* depletion. Immunocytochemical  
356 analysis of intact cells also shows that the MBNL1 nucleus/cytoplasmic ratio decreased upon  
357 *Fmr1* depletion (**Figure 5B**), which is in concordance with the cell fractionation results.

358

359 FMRP shuttles to the nucleus (Tamanini et al 1999) where it has been reported to co-localize with  
360 Cajal bodies (Dury et al 2013), membrane-less structures that frequently coincide with the  
361 nucleolus. We detected a low amount of FMRP in the nucleus of N2A cells, and considered that  
362 it may also associate with splicing factor-rich nuclear speckles (Spector and Lamond 2011).  
363 Immunostaining for splicing factor SC35, which detects a few splicing proteins (Ilik et al 2020),



364 showed abundant nuclear speckles but were not co-localized with FMRP, suggesting that FMRP  
365 is unlikely to regulate splicing directly (**Figure 5C**).

366

367 Because we had identified a correlation between elevated SETD2, dys-regulated H3K36me3  
368 chromatin marks, and altered splicing in *Fmr1* KO mouse hippocampus (Shah et al 2020), we  
369 considered this might also occur in FMRP-deficient N2A cells. However, we observed no change  
370 in SETD2 levels in these cells, indicating that a changed chromatin landscape and altered splicing  
371 in FMRP-deficient cells may not be linked (**Figure 5- figure supplement 1A**).

372

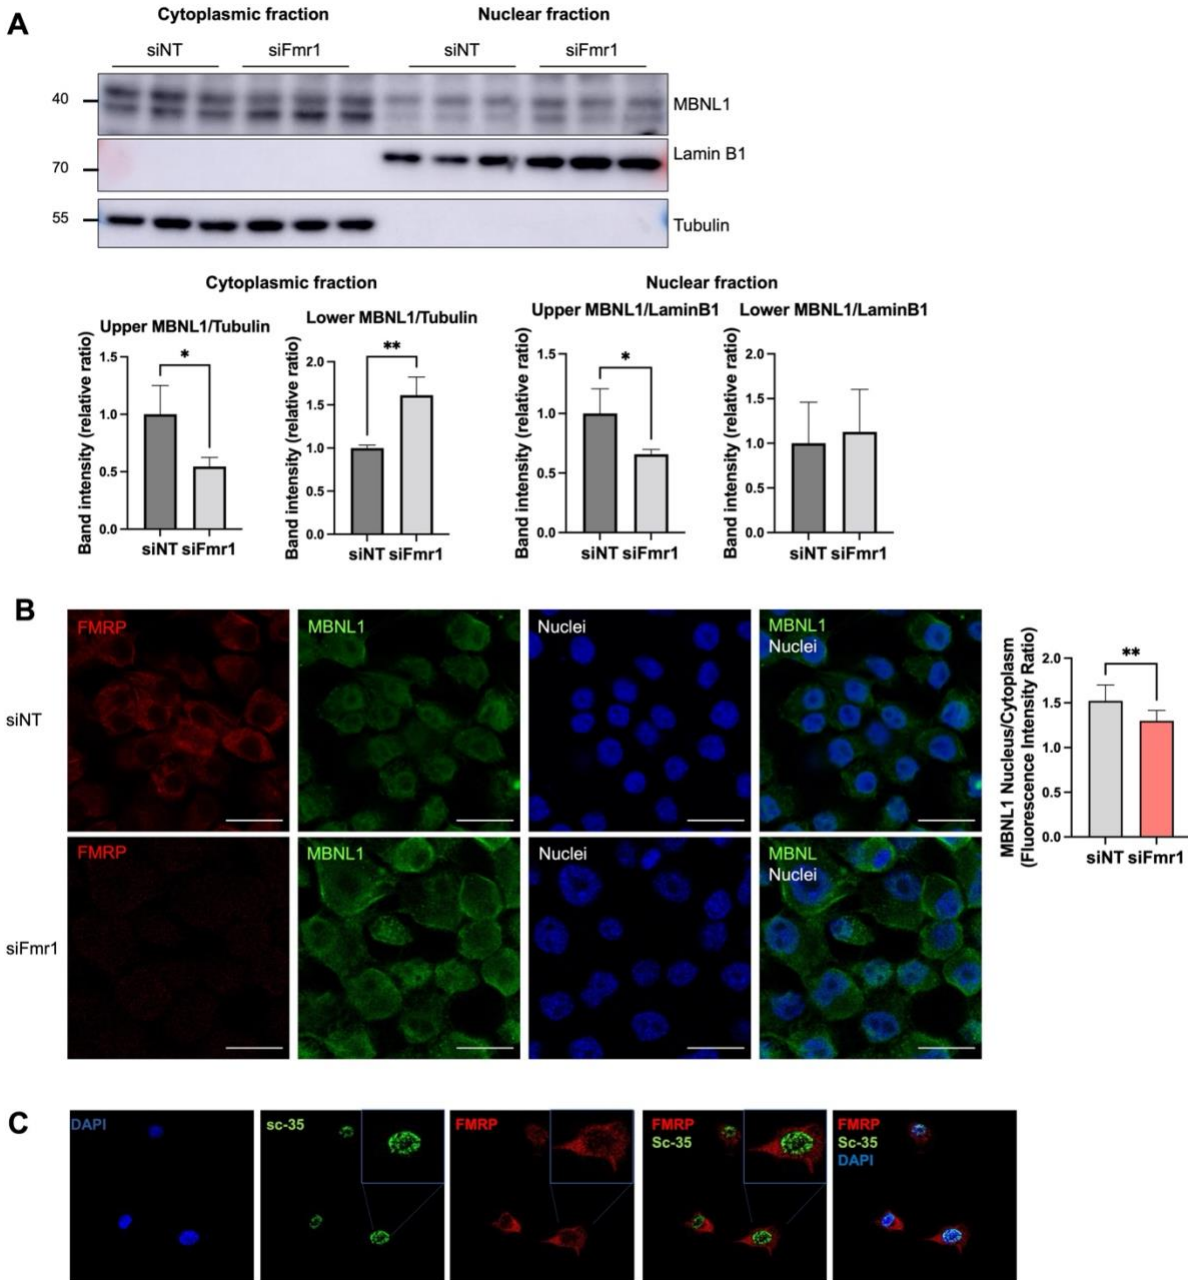

380 (B) Immunocytochemical localization of FMRP, and MBNL1 in N2A cells following *Fmr1* depletion.  
381 Quantification of the nucleus/cytoplasmic ratio of MBNL1 fluorescence intensity is at right. Mean  
382  $\pm$  S.E.M is shown (Student's t-test,  $**p < 0.01$ ). Magnification 63X. Scale bar, 20 microns.  
383 (C) Immunocytochemistry of FMRP and SC35 in N2A cells. Magnification 63X.  
384

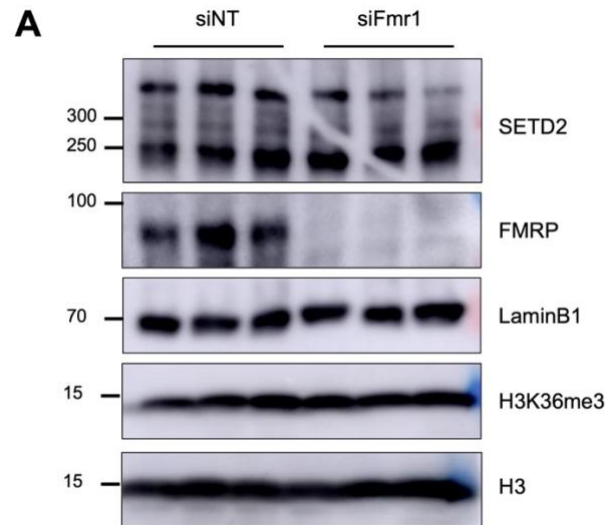

385  
386 **Figure 5 – figure supplement 1.** Western blot for SETD2 and H3K36me3 in control and *fmr1*  
387 depleted N2A cells.

388 (A) Western blot for SETD2, H3K36me3, H3, and FMRP in nuclear extracts of control and *Fmr1*  
389 deficient N2A cells. LaminB1 is used as a loading control.

390  
391 We analyzed published datasets to determine whether *Mbnl1* exon skipping occurs in the FMRP-  
392 deficient tissues. **Table 1** shows that exon 5 skipping is detected not only in *Fmr1*-depleted N2A  
393 cells, but also in mouse *Fmr1* KO peripheral tissues (liver, muscle, testis). Moreover, exon 7,  
394 which is important for MBNL1 self-dimerization, is skipped in several peripheral tissues as well as  
395 cerebellum. Although the precise function of the dimerization is unclear, exon 7 residues are  
396 thought to increase MBNL1 affinity for RNA (Konieczny et al 2018). Somewhat surprisingly, we  
397 did not detect exon 5 skipping in mouse brain, although it and exon 4 were mutually exclusive

398 exons in human Fragile X postmortem brain. These data show that FMRP-regulated alternative  
 399 splicing of *Mbnl1* is widespread, but that the exons involved in the splicing events vary according  
 400 to tissue.

401

402 **Table 1.** Alternative splicing of *Mbnl1* RNA in FMRP-deficient cells and tissues.

| Exon number   | Domain, function                                                          | Species | Sample             | Category | Inclusion difference | p. value | Reference         |
|---------------|---------------------------------------------------------------------------|---------|--------------------|----------|----------------------|----------|-------------------|
| Exon 1        | ZnF domain that important for RNA binding and splicing activity [1]       | Mouse   | LV                 | SE       | -0.146               | 0.01     | This study        |
| Exon 4/Exon 5 | ZnF domain that important for RNA binding and splicing activity/NLS [1,2] | Human   | Post-mortem cortex | MXE      | 0.21                 | 0.01     | Tran et al., 2019 |
| Exon 5        | NLS [1,2]                                                                 | Mouse   | LV                 | SE       | -0.3                 | 0.04     | This study        |
| Exon 5        | NLS [1,2]                                                                 | Mouse   | MU                 | SE       | 0.174                | 0.0005   | This study        |
| Exon 5        | NLS [1,2]                                                                 | Mouse   | TE                 | SE       | 0.191                | 0.04     | This study        |
| Exon 5        | NLS [1,2]                                                                 | Mouse   | N2A                | SE       | -0.242               | 0.06     | This study        |
| Exon 6        | Splicing regulatory domain, encode for bipartite NLS [1]                  | Mouse   | Adult NSC          | SE       | 0.33                 | 0.001    | Liu et al., 2018  |
| Exon 6        | Splicing regulatory domain, encode for bipartite NLS [1]                  | Mouse   | LV                 | A3SS     | -0.082               | 0.005    | This study        |
| Exon 7        | Enhances MBNL1 self-dimerization [2,3]                                    | Mouse   | CB                 | SE       | 0.093                | 0.03     | This study        |
| Exon 7        | Enhances MBNL1 self-dimerization [2,3]                                    | Mouse   | MU                 | SE       | 0.044                | 0.03     | This study        |
| Exon 7        | Enhances MBNL1 self-dimerization [2,3]                                    | Mouse   | TE                 | SE       | -0.332               | 0.0002   | This study        |
| Exon 7/Exon 8 | Enhances MBNL1 self-dimerization [2,3]                                    | Mouse   | MU                 | MXE      | 0.051                | 0.0008   | This study        |
| Exon 8        | Unknown                                                                   | Mouse   | MU                 | SE       | -0.101               | 0.0001   | This study        |

403

404 [1] López-Martínez et al 2020

405 [2] Tran et al 2011

406 [3] Konieczny et al 2014

407

408 **Figure 6** presents a model depicting FMRP regulation of splicing via MBNL1 in N2A cells. *Mbnl1*  
 409 pre-mRNA undergoes alternative splicing such that exon 5-containing and exon 5-lacking mRNAs  
 410 are exported to the cytoplasm. FMRP then binds these mRNAs and limits their translation. The  
 411 MBNL1 protein that retains the NLS-encoding exon 5 is transported to the nucleus where it  
 412 regulates alternative splicing of other pre-mRNAs. In *Fmr1*-deficient cells, exon 5-lacking *Mbnl1*  
 413 RNA is elevated in the cytoplasm relative to exon 5-containing RNA. Because there is no FMRP  
 414 to limit translation in these cells, MBNL1 synthesis is robust, which is particularly the case for  
 415 those *Mbnl1* mRNAs that lack exon 5 NLS. As a consequence, there is reduced MBNL1  
 416 transported to the nucleus, which has adverse effects on RNA splicing relative to normal cells.  
 417 Although this model focuses on MBNL1 in N2A cells, it represents only one of several

418 mechanisms by which FMRP controls splicing. Indeed, as shown in **Figure 3** multiple factors  
419 regulate mRNA splicing in an FMRP-dependent manner.

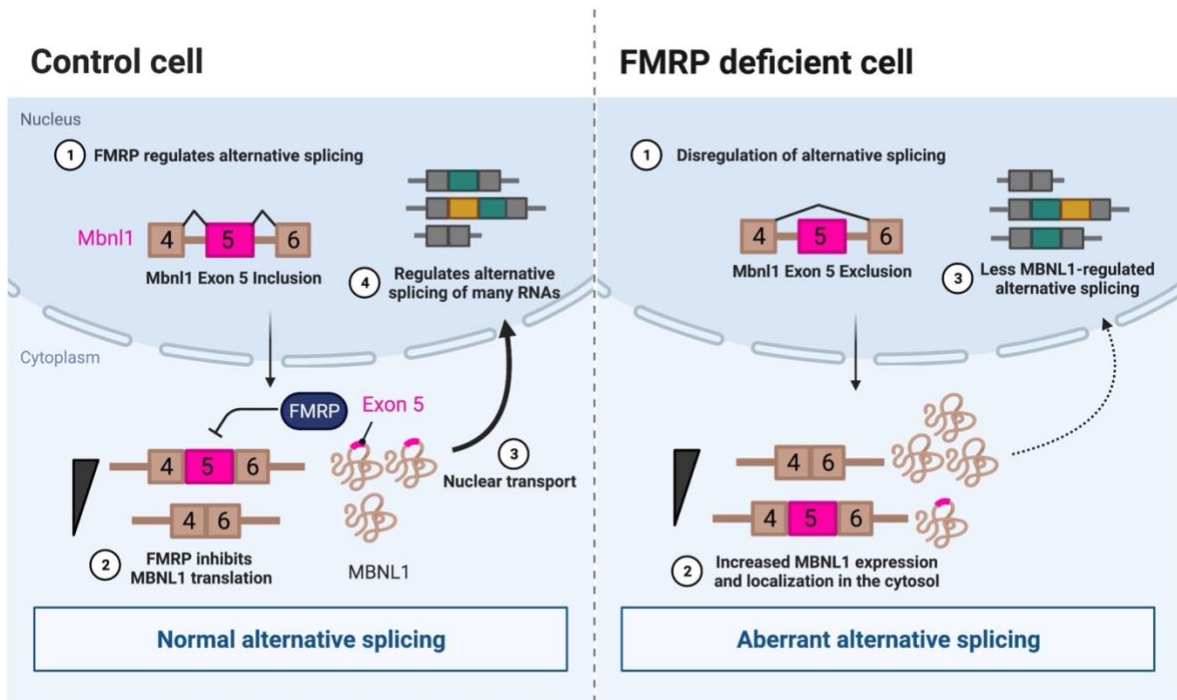

420  
421 **Figure 6.** Summary model to explain how FMRP regulates some splicing events through  
422 regulation of *Mbn1* RNA self-splicing and translational control. See text for details. Created with  
423 BioRender.com.

424  
425

## Discussion

426 The proteome of the hippocampus, an exceptionally well-studied brain region of Fragile X  
427 Syndrome model mice, is largely attributed to altered mRNA translation with perhaps a minor  
428 contribution of protein degradation (Kelleher and Bear, 2008; Huber et al 2015; Bowling et al  
429 2019; Richter and Zhao 2021). This study indicates that mis-regulated alternative splicing almost  
430 certainly is a large contributor to the Fragile X proteome not only in the hippocampus and other  
431 brain regions of *Fmr1*-deficient mice, but in peripheral tissues as well. Our investigation of the  
432 mechanism of FMRP-mediated splicing used *Fmr1*-deficient N2A cells, which was based on the  
433 assumption that a single cell type would more likely reveal the involvement of specific factors than  
434 a complex mixture of cells such as in the brain. By mapping splicing factor binding sites flanking  
435 certain skipped or included exons in 3 mRNAs in *Fmr1*-depleted cells, we found that four proteins:  
436 MBNL1, PTB1P, and hnRNPF contribute to alternative splicing mis-regulation. The mRNAs  
437 encoding two of these proteins, *Mbnl1* and *hnRNPQ*, are translationally inhibited by FMRP.  
438 Moreover, *Mbnl1* self-splicing induced skipping of the NLS-containing exon 5, which is thought to  
439 be enhanced by elevated levels of MBNL1 protein (Konieczny et al 2014), was observed. This  
440 event impairs MBNL1 nuclear transport, which in turn likely affects downstream splicing decisions.  
441 *Mbnl1* exon 5 is also skipped in *Fmr1*-deficient mouse peripheral tissues as well as in human  
442 postmortem Fragile X brain. Exons 6, 7, and 8 are skipped in neural stem cells, and/or liver,  
443 muscle, testis, and cerebellum from *Fmr1*-deficient mice. Thus, FMRP regulation of *Mbnl1* splicing  
444 is complex and is strongly influenced by cell/tissue-type, which likely contributes to downstream  
445 splicing regulation.

446

447 The regulation of splicing via MBNL1 is only one of several FMRP-dependent mechanisms that  
448 mediate RNA processing. PTBP1, hnRNPF, and hnRNPQ all influence splicing decisions that are  
449 downstream of FMRP. For both MBNL1 and hnRNPQ, this involves FMRP-regulated translation

450 of their respective mRNAs. In this sense, FMRP control of splicing is similar to FMRP control of  
451 chromatin modifications and transcription; the root cause of the alteration of these molecular  
452 events is dys-regulated translation when FMRP is absent (Korb et al 2017; Shah et al 2020). We  
453 also considered whether FMRP might influence splicing directly. It is a nuclear shuttling protein  
454 that at least in mouse testis, binds chromatin and is involved in the DNA damage response  
455 (Alpatov et al 2014). FMRP co-localizes with Cajal bodies in Hela cells, which implies it may  
456 modify rRNA biogenesis (Dury et al 2013). We inferred that if FMRP was a direct regulator of  
457 splicing, it would co-localize with SC35-containing nuclear splicing/processing bodies or speckles  
458 (Spector and Lamond 2011). We did not detect any such co-localization and thus FMRP is unlikely  
459 to be a direct modulator of splicing. In addition, we previously reported a correlation between the  
460 up-regulation of SETD2, altered H3K36me3 chromatin marks, and RNA splicing mis-regulation in  
461 *Fmr1*-deficient mouse brain (Shah et al 2020). In *Fmr1* KO N2A cells, however, we detected no  
462 alteration in SETD2 levels, and thus a change in H3K36me3 leading to splicing dys-regulation is  
463 unlikely.

464

465 In most cases, the dys-regulated inclusion/exclusion of exons in *Fmr1*-deficient tissues/cells has  
466 a mean of ~20%, but with a large distribution. Although the magnitude of such changes is within  
467 the range often observed for alternative splicing (Tapial et al 2017), it is unclear to what extent  
468 these splicing changes have biological consequences. However, even modest changes in exon  
469 skipping can manifest themselves with changes in biology if a skipped exon is regulatory. For  
470 example, an exon encoding a regulatory phosphorylation site in the RNA binding protein CPEB4  
471 is skipped <30% of the time but this skipping is correlated with if not causative for autism (Parras  
472 et al 2018). In the *Fmr1* KO mouse, we cannot ascribe any single mis-splicing event as  
473 contributing to a Fragile X phenotype. Instead, it is more likely that the amalgamation of hundreds  
474 of mis-splicing events result in some Fragile X pathophysiology, for example, dys-regulated  
475 synaptic transmission or learning and memory (Huber et al 2000; Udagawa et al 2013).



476

477 Finally, the dys-regulated splicing in Fragile X model mice may represent a point of convergence  
478 with other neurodevelopmental disorders (Shah and Richter 2021). For example, splicing is  
479 impaired in autism spectrum disorders (Irimia et al 2014), Rett Syndrome (Li et al 2016), Pten  
480 (Thacker et al 2020), and others (Shah et al 2021). Whether mis-splicing in these disorders are  
481 related mechanistically is unclear, but they may involve several of the same factors (e.g., MBNL1,  
482 PTBP1). More intriguing is the prospect that some mis-splicing events link similar behavioral or  
483 other physiological impairments among these disorders. This may especially be the case when  
484 very small microexons encoding regulatory domains are skipped (Gonatopoulos-Pournatzis and  
485 Blencowe 2020). Future studies will be necessary determine whether specific mis-splicing events  
486 promote pathophysiological outcomes.

487

488

489

## Materials and Methods

490

### 491 **Animals**

492 Mice were housed under a 12 h light/dark cycle with free access to food and water. Wild-type and  
493 *Fmr1* KO mice were purchased from the Jackson Laboratories. Two to three month old male mice  
494 were used in this study (n=3 each for WT and *Fmr1* KO). Animal maintenance and experimental  
495 procedures were performed accordance with all animal research guidelines from University of  
496 Massachusetts Chan Medical School.

497

### 498 **Cell culture and siRNA transfection**

499 Mouse N2A cells were cultured in Dulbecco's Modified Eagels Medium (DMEM) supplemented  
500 with 10% fetal bovine serum (FBS) and antibiotics. The siRNAs targeting *Fmr1*, *Ptbp1*, *hnRNPF*,  
501 *hnRNPF*, and *Mbnl1* were purchased from IDT. As a negative control siRNA, siNT (ON-  
502 TARGETplus) was purchased from Dharmacon. For siRNA transfection,  $1 \times 10^5$  cells were seeded  
503 in 6-well plates overnight and transfected with 20-25 pmol of the indicated siRNAs using  
504 Lipofectamine 3000 (ThermoFisher Scientific, 13778030) following the manufacturer's  
505 instructions. For double depletion experiments, cells were transfected in triplicate as follows: 1)  
506 siNT (80 pmol), 2) siFmr1 (40 pmol) + siNT (40 pmol), 3) siMbnl1 (40 pmol) + siNT (40 pmol), 4)  
507 siFmr1 (40 pmol) + siMbnl1 (40 pmol). Cells were incubated with the indicated siRNAs for 48-72  
508 h before being analyzed.

509

### 510 **RT-PCR and qPCR**

511 Total RNA was isolated using TRIzol-LS (Invitrogen, 10296-028) and total RNA (1  $\mu$ g) was  
512 reverse transcribed using QuantiTect Reverse Transcription Kit (Qiagen, 205313) according to  
513 manufacturer's instructions. RT-PCR was performed using GoTaq Green Master Mix (Promega,  
514 M7123). 2  $\mu$ l of diluted cDNA was added to 12.5  $\mu$ l GoTaq Green Master Mix and 0.4  $\mu$ M of

515 forward and reverse primers and nuclease-free water in a 25  $\mu$ l reaction. PCR amplification was  
516 performed as follow: initial denaturation at 95  $^{\circ}$ C for 2 min, 30 cycles of denaturation at 95  $^{\circ}$ C for  
517 30 s, annealing at each primer's annealing temperature for 1 min, and 72  $^{\circ}$ C for 1 min/kb and final  
518 extension at 72  $^{\circ}$ C for 5min. qPCR was performed with QuantStudio3 (ThermoFisher Scientific)  
519 as follow: initial denaturation at 95  $^{\circ}$ C for 10 min, 39 cycles of denaturation at 95  $^{\circ}$ C for 15 s  
520 annealing and extension at 60  $^{\circ}$ C for 1 min. Exon inclusion and exclusion levels were quantified  
521 using qPCR. For alternative splicing validation, primers were designed to specifically amplify  
522 exon-exon junctions of the included or skipped isoform. A primer pair amplifying a constitutive  
523 exon in each mRNA was used to determine changes in total mRNA expression between  
524 genotypes. Primer sequence information is listed below.

525

#### 526 **Western blot**

527 Cells were washed with ice-cold PBS and collected using trypsin to release them from the  
528 plasticware. After centrifugation, the cells were lysed with ice-cold RIPA buffer (NaCl 150 mM,  
529 Triton X-100 1%, sodium deoxycholate 0.5%, SDS 0.1% and Tris-HCl 50 mM pH 8.0) with  
530 cOmplete Mini EDTA-free protease inhibitor cocktail (Sigma, 11836170001) and PhosSTOP  
531 (Sigma, 4906837001) and rotated for 10 min at 4  $^{\circ}$ C. The lysates were collected by centrifugation  
532 at 12,000 rpm for 10 min at 4  $^{\circ}$ C. Supernatants were removed and the protein concentration was  
533 quantified using the colorimetric assay by Pierce<sup>TM</sup> BCA protein assay kit (ThermoFisher  
534 Scientific, 23225). Protein lysates were resolved using 10% SDS-PAGE gels and transferred to  
535 0.45  $\mu$ m PVDF membranes (Millipore, IPVH00010). The membranes were blocked in 5% skim  
536 milk solution for 1 h at RT then incubated with primary antibody at 4  $^{\circ}$ C overnight: Anti-FMRP  
537 antibody (Abcam, ab17722, 1:1,000), anti-GAPDH antibody (Cell signaling technology, 2118,  
538 1:1,000), anti-alpha-Tubulin (Sigma, T5168, 1:1,000), anti-Lamin B1(Abcam, ab16048, 1:2,000),  
539 anti-MBNL1 (Cell signaling technology, 94633, 1:1,000), anti-PTBP1 (Cell signaling technology,

540 57246, 1:1,000), anti-hnRNPF (Novusbio, NBP2-57442-25  $\mu$ l, 1:1,000), anti-hnRNPQ (Abclonal,  
541 A9609, 1:1,000), anti-SETD2 (Abclonal, A11271, 1:1,000), anti-histone H3K36me3 (Abcam,  
542 ab9050, 1:1000), anti-histone H3 (Abcam, ab18521, 1:1000). The membranes were incubated  
543 with horse radish peroxidase (HRP)-linked secondary anti-rabbit (Jackson ImmunoResearch,  
544 211-032-171, 1:5,000) or anti-mouse (Jackson ImmunoResearch, 115-035-174, 1:5,000)  
545 antibody and developed with ECL (Pierce, NEL105001EA). Immunoreactive bands were detected  
546 using GE Amersham Imager.

547

#### 548 **Cytosol and nuclear protein fractionation**

549 Cells were washed with ice-cold PBS, collected by trypsinization, pellets collected by  
550 centrifugation, and then resuspended in Triton extraction buffer (TEB, PBS containing 0.5% triton  
551 X-100 (v/v), 2 mM phenylmethylsulfonyl fluoride, 0.02% NaN<sub>3</sub>) and lysed on ice for 10 min.  
552 Following a centrifugation at 12,000 rpm at 4 °C, the supernatants were saved for cytoplasmic  
553 protein and the pellets were resuspended in nuclear lysis buffer (50 mM Tris-HCl pH 7.4, 120 mM  
554 NaCl, 1 mM EDTA, 1% Triton X-100, 0.1% SDS) and lysed by sonication at high power for 8  
555 cycles (15 sec on, 60 sec off) using a Bioruptor (Diagenode). The lysates were collected after  
556 centrifugation at 13,000 rpm for 10 min at 4 °C and the supernatants were prepared for nuclear  
557 protein analysis. Nuclear and cytoplasmic protein concentrations were measured using BCA  
558 assays.

559

#### 560 **RNA-seq**

561 Mouse tissues were powdered in liquid nitrogen with a frozen mortar and pestle. For RNA  
562 extraction, TRIzol was added to the tissue powder and homogenized with Dounce tissue  
563 homogenizer. The RNA was treated with TurboDNase (Invitrogen, AM2238) to remove genomic  
564 DNA contamination. For peripheral tissues and N2A cells, total RNA was extracted and the

565 integrity analyzed by a fragment analyzer. Library preparation and RNA sequencing were  
566 performed by Novogene (CA, USA). For brain samples, polyadenylated mRNA was enriched  
567 using Nextflex Poly(A) Beads (NEXTflex, Bioo Scientific Corp, 512980) and cDNA libraries were  
568 prepared using a NEXTflex Rapid Directional qRNA-Seq Kit (Bioo Scientific Corp, NOVA-5130-  
569 03D). In brief, the mRNA was randomly fragmented, reverse transcribed, and double-stranded  
570 cDNA was adenylated and ligated to index adapters. The cDNA was amplified by PCR and  
571 purified with AMPure beads (Beckman Coulter, A63881). The libraries were quantified with a  
572 KAPA Library Quantification Kit (KAPA Biosystems, KK4873) and the quality and size were  
573 analyzed by a fragment analyzer. Pooled libraries were sequenced on an NextSeq500 Sequencer  
574 using NextSeq 500/550 High Output Kit v2.5 (Illumina, 20024906, 75 base paired ends).

575

#### 576 **Differential expression and alternative splicing analysis**

577 RNA-seq analysis was performed using DolphinNext pipeline at UMass Chan Medical School  
578 (Yukselen et al 2020). Quality trimming was conducted using Fastqc (v0.11.8) and Trimmomatic  
579 (v.0.39). Reads below a minimum quality PHRED score of 15 at the 10nt sliding window were first  
580 clipped and the clipped reads shorter than 25nt were trimmed. The trimmed reads were mapped  
581 to rRNA by Bowtie2 (v2.3.5) were further filtered out. The cleaned reads were aligned to the  
582 mouse reference genome (mm10) with STAR (v1.16.1), and gene expression was quantified by  
583 RSEM (v1.3.1). Differential gene expression was analyzed using DESeq2 (v1.16.1). The FDR  
584 adjusted p-value  $< 0.05$  and  $\log_2FC > 0.2$  or  $< -0.2$  was used as the cut-offs to identify the  
585 differentially expressed genes. Alternative splicing events are analyzed using rMATS (v3.0.9)  
586 (Shen et al 2014) and p-value and PSI  $> 0.05$  was used as the cut-offs for splicing events. To  
587 assess biological function, Gene Ontology (GO) term analysis was conducted using clusterProfiler  
588 R package (Wu et al 2021, Yu et al 2012). Significant RNA Overlap from WT and *Fmr1* KO  
589 hippocampus, cortex, and cerebellum was analyzed using DynaVenn (Amand et al 2019) using  
590 p-value ordered RNA list.

591

## 592 **Generation of an *Fmr1* CRISPR/Cas9-edited cell line**

593 To construct an *Fmr1* KO N2A mouse cell line, an *Fmr1* exon 3 DNA oligonucleotide was inserted  
594 into pLentiCRISPR (Addgene, 49535) adapted from published methods (Li et al 2020). Briefly,  
595 annealed and phosphorylated oligonucleotides were cloned into a FastDigest BmsBI  
596 (Fermentas)-digested vector following the manufacturer's protocol. pLentiCRISPR-m*Fmr1*Exon3  
597 was co-transfected with pMD2.G and psPAX2 into HEK293T cells. The viral particles containing  
598 supernatants were collected after 48 h of transfection by filtering through 0.45 µm filters and  
599 transduced to N2A cells. After 3 days of infection, transduced cells were selected with puromycin  
600 for 2 weeks. Puromycin resistant cells were seeded in each well of a 96 well plate with a single  
601 cell per well. Single cell-derived colonies were obtained after several weeks of culture and verified  
602 for *Fmr1* knockout by Sanger DNA sequencing and western blotting. For the sequencing, genomic  
603 DNA was extracted using lysis buffer (10 mM Tris 8.0, 200 mM NaCl, 20 mM EDTA, 0.2% Triton  
604 X-100 and 100 µg/ml proteinase K) and the deleted exon region was PCR amplified using primers  
605 (sequences noted below). To identify deleted sequences, the PCR products were cloned with a  
606 TOPO TA Cloning Kit (ThermoFisher Scientific, 450030) followed by sequencing using T7 primers  
607 (Genewiz).

608

## 609 **Alternative splicing reporter system**

610 To generate an alternative splicing reporter, total DNA was isolated from N2A cells using the lysis  
611 buffer described above. *Mapt* exon 4 and flanking the intron regions were PCR amplified using  
612 Phusion High-Fidelity DNA polymerase and inserted into NheI/BamHI digested pFlareA Plasmid  
613 (Addgene, 90249) and sequenced. Cultured N2A control and *Fmr1* CRISPR/Cas9 KO cells were  
614 seeded in 6-well plates overnight and then transfected using 7.5 µl of Lipofectamine 3000  
615 (Invitrogen) and 5 µl of P3000 with the 1 µg of pFlareA-*Mapt* exon4 splicing reporter. For the  
616 rescue experiment, 1.5 µg of pcDNA-myc or pcDNA-mouse FMRP ectopic expression plasmids

617 was added. Transfected cells were washed with PBS and collected by trypsinization 48 h after  
618 transfection. GFP and mCherry fluorescence intensities were detected using flow cytometry (LSR  
619 II A-5 Donald).

620

### 621 **RNA-Immunoprecipitation (RNA-IP)**

622 N2A cells were transfected with siNT and siFmr1 using Lipofectamine 3000. After 72 h of  
623 incubation, the cells were washed with fresh media containing 100 µg/ml cycloheximide (CHX,  
624 Sigma, C4859). After washing with ice-cold PBS-containing CHX, the cells were pelleted and  
625 lysed in 1X polysome buffer [20 mM Tris-HCl pH 7.5, 5 mM MgCl<sub>2</sub>, 100 mM KCl, 1 mM DTT, 100  
626 µg/ml CHX, protease inhibitor cocktails, 1 % Triton X-100 (v/v)] with 10 passages through a 25 G  
627 needle to triturate and incubated on ice for 10 min. The lysates were centrifuged at 14,000 x g at  
628 4 °C and RNA concentration was measured using Qubit BR RNA Assay Kits (ThermoFisher  
629 Scientific, Q10210). For IP, 5 µg of RNA was precleared with 25 µl of Protein G Dynabeads  
630 (Invitrogen, 10003D) for 30 min at 4 °C. 10% of aliquot of the precleared lysates were saved as  
631 an input. 2.5 µg of FMRP antibody (Abcam, ab17722) or IgG (Sigma, 12-370) was added to the  
632 precleared lysates and incubated for 2 h at 4 °C. 25 µl of Protein G Dynabeads was added and  
633 incubated for 30 min at 4 °C and the beads were gently washed with wash buffer [20 mM Tris-  
634 HCl, 100 mM KCl, 5 mM MgCl<sub>2</sub>, 1% Triton X-100 (v/v)] for 3 times. RNA was extracted using  
635 TRIzol and 100 ng of RNA were reverse transcribed using Quantitect followed by qPCR using  
636 iTaq SYBRgreen (Bio-rad, 1725122).

637

### 638 **Immunocytochemistry**

639 For immunofluorescent staining, 1x10<sup>5</sup> cells were seeded in a Chamber Slide (Nunc Lab-Tek II  
640 CC2, 154917) and transfected with 10 pmol siNT and siFmr1. After 48 h, cells were washed and  
641 fixed with 4 % formaldehyde solution (ThermoFisher Scientific, AAJ19943K2) for 10 min at RT.



642 The fixed cells were washed with PBS three times and permeabilized using 0.1% Triton X-100 in  
643 PBS for 15 min at RT. The cells were washed with PBS three times and incubated with blocking  
644 buffer (1% BSA in PBS) for 1h at RT. Cells were then incubated overnight at 4 °C with primary  
645 antibodies anti-FMRP (Abcam, Ab17722, 1:500), anti-MBNL1 (ThermoFisher, 66837-IG, 1:100)  
646 or anti-Sc35 (Millipore Sigma, S4045, 1:1000) and incubated with the secondary antibodies using  
647 Alexa 488-labeled goat anti-mouse IgG (Abcam, Ab150113, 1:1000), Alexa 594-labeled goat anti-  
648 rabbit IgG (ThermoFisher, A-10012, 1:250). Hoechst 33342 was used to stain the cell nuclei at  
649 0.2 µg/ml for 15 min. Coverslips were mounted using FlourSave reagent (Milipore, 345789).  
650 Images were acquired using a Zeiss confocal microscope LSM900.

651

## 652 **Data availability**

653 RNA-seq datasets are available in GEO (accession number GSE207145).

654

## **Primers for validation of alternative splicing**

|               |                         |
|---------------|-------------------------|
| Dcun1d2 Ex5 F | ATGGCTGTTGCATATTGGAAGTT |
| Dcun1d2 Ex7 R | CAGGCGGCTTCTAAAGCACT    |
| Dcun1d2 Ex2 F | GCTCAGAAGGACAAGGTCCG    |
| Dcun1d2 Ex2 R | TAGACTCTCGGTGAAACGCC    |
| Tnik SJC F    | CGGCCAGCTGATCTGACG      |
| Tnik SJC R    | CTCACTGCTCTCCGACTCCT    |
| Tnik IJC F    | AAGTCCGAAGGATCACCCGT    |
| Tnik IJC R    | TGCCGTCAGATCCTCATCTAT   |
| Tnik Ex20 F   | ATCCAGAGACATCACACGGC    |
| Tnik Ex22 R   | TTCAGGGGGCGGTTTGT       |
| Tnik Ex25 F   | GGCCAAACTCAATGAAGCGA    |
| Tnik Ex25 R   | GGTGTGTCATATGAGGGCG     |
| Ski IJC F     | GTGCCCCGGGTCTCA         |
| Ski IJC R     | GACGTCTCTTTCTCACTCGC    |
| Ski SJC F     | CCTGCCACTGGGGCTTC       |
| Ski SJC R     | AGCCGAGGCTCCGGG         |

|                 |                          |
|-----------------|--------------------------|
| Wnk1 SJC F      | CAGGGAATACAGCCAACTGTTC   |
| Wnk1 SJC R      | ACTCCCTGAGTACTCTGTGTTC   |
| Wnk1 IJC F      | ACCTTGGCTTCATCTGCTACA    |
| Wnk1 IJC R      | TGAGTACTCTGGTACAAAACATCT |
| App SJC F       | TGCTCTGAACAAGCCGAGAC     |
| App SJC R       | CTGTCGTGGGAAACACGCTG     |
| App IJC F       | GCAGCGTGTCAACCCAAAG      |
| App IJC R       | GGGACATTCTCTCTCGGTGC     |
| Mapt SJC F      | TGAACCAGTATGGCTGACCC     |
| Mapt SJC R      | GCTGGCCACACGAGCTTTTA     |
| Mapt IJC F      | TGGCTTAAAAGCCGAAGAAGC    |
| Mapt IJC R      | TCTTCTCGTCATTTCTGTCTG    |
| Os9 SJC F       | TGGACAAACTCATCAAGAGGCT   |
| Os9 SJC R       | AATCTTGCCTGTAGGGTGTGG    |
| Os9 IJC F       | ACCCTACAGAGGAGGAACCTG    |
| Os9 IJC R       | CAATCTTGCCTTCCGCCGTG     |
| Mapt Ex15 F     | AAAATCCGGAGAACGAAGCG     |
| Mapt Ex15 R     | AGGCGGCTCTTACTAGCTGA     |
| App Ex2 F       | TCGCCATGTTCTGTGGTAAAC    |
| App Ex2 R       | AATGCAGGTTTTGGTCCCTGA    |
| Mbnl1 Ex5 IJC F | AGCTGCCATGACTCAGTCGG     |
| Mbnl1 Ex5 IJC R | GAGGAATCCCAGGTCAAAGGT    |
| Mbnl1 Ex7 IJC F | CTACTGCAGCTGCCATGGGAAT   |
| Mbnl1 Ex7 IJC R | AAGAGCAGGCCTCTTTGGCAAT   |
| Mbnl1 Ex10 F    | ATGGTGAGGGAGGGAACTGA     |
| Mbnl1 Ex10 R    | GGTACTTAAAGCCATGGTGTGC   |
| Mbnl1 Ex5 IJC F | AGCTGCCATGACTCAGTCGG     |
| Mbnl1 Ex5 IJC R | GAGGAATCCCAGGTCAAAGGT    |
| Mbnl1 Ex5 SJC F | CTACTGCAGCTGCCATGGGAAT   |
| Mbnl1 Ex5 SJC R | AAGAGCAGGCCTCTTTGGCAAT   |

655

#### Primers for pFlareA reporter cloning

|                       |                          |
|-----------------------|--------------------------|
| NheI-Mapt Ex4-BamHI-F | GCTAGCTAGCTTCTGGGTACA    |
| NheI-Mapt Ex4-BamHI-R | CGCGGATCCAAGCGTATCTGTGAC |

656

### Primers for qPCR

|          |                        |
|----------|------------------------|
| Mbn1 F   | AGCTGTACTTCCCCCATTGC   |
| Mbn1 R   | AGCGGGTGTCATGCACAATA   |
| Ptbp1 F  | AGTGCGCATTACACTGTCCA   |
| Ptbp1 R  | CTTGAGGTCGTCCTCTGACA   |
| hnRNPF F | CCACTCAACCCTGTGAGAGT   |
| hnRNPF R | TTGCTAGCCCCTGTTGTTGA   |
| hnRNPQ F | AGCCCATGGATACTACTTCAGC |
| hnRNPQ R | ATGTGCAACTAGCCCTGCAA   |
| Srsf5 F  | GGTGACGATTGAACATGCC    |
| Srsf5 R  | CGACTGCTAAAACGGTCGGA   |

657

658

### Primers for construction of CRISPR/Cas9 KO cell line

|               |                           |                          |
|---------------|---------------------------|--------------------------|
| mFmr1-sgE3-F  | CACCGTATTATAACCTACAGGTGGT | sgRNA for pLenticrispr   |
| mFmr1-sgE3-R  | AAACACCACCTGTAGGTTATAATAC | sgRNA for pLenticrispr   |
| mFmr1 E3 GT F | ACCAAGAAAGAGTCACATTTAACCA | Deletion genotype primer |
| mFmr1 E3 GT R | GGGGTAAAGAACTTGGGACA      | Deletion genotype primer |

659

660

661

## **Acknowledgments**

662

663 We thank Ms. SitharaRaju Ponny for advice on bioinformatic and statistical analysis and Dr.

664 Heleen van't Spijker for assistance with immunofluorescence microscopy. We thank Dr. Mariya

665 Ivshina for insightful conversations related to this study and Drs. Pablo Visconti and Maria Gracia

666 Gervasi (University of Massachusetts Amherst) for assistance with some initial experiments. This

667 work was supported by NIH grants GM046779, GM135087, UL1-TR001453, and a grant from

668 FRAXA. SS was a FRAXA postdoctoral fellow.

669

670

## **Competing interests**

671

672 All authors declare no financial or non-financial competing interests.

673

674

675

676

## References

- 677 Akerman A, David-Eden H, Pinter RY, Mandel-Gutfreund Y (2009). **A computational approach**  
678 **for genome-wide mapping of splicing factor binding sites.** *Genome Biology* **10**:R30.  
679 <https://doi.org/10.1186/gb-2009-10-3-r30>  
680
- 681 Alpatov R, Lesch BJ, Nakamoto-Kinoshita M, Blanco A, Chen S, Stützer A, Armache KJ, Simon  
682 MD, Xu C, Ali M, Murn J, Prusic S, Kutateladze TG, Vakoc CR, Min J, Kingston RE, Fischle W,  
683 Warren ST, Page DC, Shi Y (2014). **A chromatin-dependent role of the fragile X mental**  
684 **retardation protein FMRP in the DNA damage response.** *Cell* **157**:869-881.  
685 <https://doi.org/10.1016/j.cell.2014.03.040>  
686
- 687 Amand, J., Fehlmann, T., Backes, C., & Keller, A. (2019). **DynaVenn: web-based computation**  
688 **of the most significant overlap between ordered sets.** *BMC bioinformatics*, **20**: 1-5.  
689 <https://doi.org/10.1186/s12859-019-3320-5>  
690
- 691 Bhattacharya S, Levy MJ, Zhang N, Li H, Florens L, Washburn MP, Workman JL (2021). **The**  
692 **methyltransferase SETD2 couples transcription and splicing by engaging mRNA**  
693 **processing factors through its SH1 domain.** *Nature Communications* **12**:1443.  
694 <https://doi.org/10.1038/s41467-021-21663-w>  
695
- 696 Bowling H, Bhattacharya A, Zhang G, Alam D, Lebowitz JZ, Bohm-Levine N, Lin D, Singha P,  
697 Mamcarz M, Puckett R, Zhou L, Aryal S, Sharp K, Kirshenbaum K, Berry-Kravis E, Neubert TA,  
698 Klann E (2019). **Altered steady state and activity-dependent de novo protein expression in**  
699 **fragile X syndrome.** *Nature Communications* **10**:1710.  
700 <https://doi.org/10.1038/s41467-019-09553-8>  
701
- 702 Darnell JC, Van Driesche SJ, Zhang C, Hung KY, Mele A, Fraser CE, Stone EF, Chen C, Fak JJ,  
703 Chi SW, Licatalosi DD, Richter JD, Darnell RB (2011). **FMRP stalls ribosomal translocation on**  
704 **mRNAs linked to synaptic function and autism.** *Cell* **146**:247-261.  
705 <https://doi.org/10.1016/j.cell.2011.06.013>  
706
- 707 Das Sharma S, Metz JB, Li H, Hobson BD, Hornstein N, Sulzer D, Tang G, Sims PA (2019).  
708 **Widespread Alterations in Translation Elongation in the Brain of Juvenile Fmr1 Knockout**  
709 **Mice.** *Cell Reports* **26**:3313-3322.  
710 <https://doi.org/10.1016/j.celrep.2019.02.086>  
711
- 712 Dölen G, Osterweil E, Rao BS, Smith GB, Auerbach BD, Chattarji S, Bear MF. (2007) **Correction**  
713 **of fragile X syndrome in mice.** *Neuron* **56**:955-962.  
714 <https://doi.org/10.1016/j.neuron.2007.12.001>  
715
- 716 Dury AY, El Fatimy R, Tremblay S, Rose TM, Côté J, De Koninck P, Khandjian EW (2013).  
717 **Nuclear Fragile X Mental Retardation Protein is localized to Cajal bodies.** *PLoS Genetics*  
718 **9**:e1003890.  
719 <https://doi.org/10.1371/journal.pgen.1003890>  
720
- 721 El Fatimy R, Davidovic L, Tremblay S, Jaglin X, Dury A, Robert C, De Koninck P, Khandjian EW  
722 (2016). **Tracking the Fragile X Mental Retardation Protein in a Highly Ordered Neuronal**  
723 **RiboNucleoParticles Population: A Link between Stalled Polyribosomes and RNA**  
724 **Granules.** *PLoS Genetics* **12**:e1006192  
725 <https://doi.org/10.1371/journal.pgen.1006192>

- 726  
727 Feng Y, Absher D, Eberhart DE, Brown V, Malter HE, Warren ST (1997). **FMRP associates**  
728 **with polyribosomes as an mRNP, and the I304N mutation of severe fragile X syndrome**  
729 **abolishes this association.** *Molecular Cell* **1**:109-118.  
730 [https://doi.org/10.1016/s1097-2765\(00\)80012-x](https://doi.org/10.1016/s1097-2765(00)80012-x)  
731  
732 Gates DP, Coonrod LA, Berglund JA (2011) **Autoregulated splicing of muscleblind-like 1**  
733 **(MBNL1) Pre-mRNA.** *Journal of Biological Chemistry* **286**:34224-4233.  
734 <https://doi.org/10.1074/jbc.M111.236547>  
735  
736 Gonatopoulos-Pournatzis T, Blencowe BJ (2020). **Microexons: at the nexus of nervous**  
737 **system development, behaviour and autism spectrum disorder.** *Current Opinion in Genetics*  
738 *and Development* **65**:22-33.  
739 <https://doi.org/10.1016/j.gde.2020.03.007>  
740  
741 Hagerman RJ, Berry-Kravis E, Hazlett HC, Bailey DB Jr, Moine H, Kooy RF, Tassone F, Gantois  
742 I, Sonenberg N, Mandel JL, Hagerman PJ (2017). **Fragile X syndrome.** *Nature Reviews*  
743 *Discovery Primers* **3**:17065.  
744 <https://doi.org/10.1038/nrdp.2017.65>  
745  
746 Hale CR, Sawicka K, Mora K, Fak JJ, Kang JJ, Cutrim P, Cialowicz K, Carroll TS, Darnell RB  
747 (2021). **FMRP regulates mRNAs encoding distinct functions in the cell body and dendrites**  
748 **of CA1 pyramidal neurons.** *Elife* **10**:e71892.  
749 <https://doi.org/10.7554/eLife.71892>  
750  
751 Huber KM, Kayser MS, Bear MF (2000). **Role for rapid dendritic protein synthesis in**  
752 **hippocampal mGluR-dependent long-term depression.** *Science* **288**:1254-1257.  
753 <https://doi.org/10.1126/science.288.5469.1254>  
754  
755 Huber KM, Klann E, Costa-Mattioli M, Zukin RS (2015). **Dysregulation of Mammalian Target of**  
756 **Rapamycin Signaling in Mouse Models of Autism.** *Journal of Neuroscience* **35**:13836-13842.  
757 <https://doi.org/10.1523/JNEUROSCI.2656-15.2015>  
758  
759 Ilik İA, Malszycki M, Lübke AK, Schade C, Meierhofer D, Aktaş T (2020). **SON and SRRM2 are**  
760 **essential for nuclear speckle formation.** *Elife* **9**:e60579.  
761 <https://doi.org/10.7554/eLife.60579>  
762  
763 Irimia M, Weatheritt RJ, Ellis JD, Parikshak NN, Gonatopoulos-Pournatzis T, Babor M, et al.  
764 (2014). **A highly conserved program of neuronal microexons is regulated in autistic brains.**  
765 *Cell* **159**:1511–1523.  
766 <https://doi.org/10.1016/j.cell.2014.11.035>  
767  
768 Kelleher RJ 3rd, Bear NF (2008). **The autistic neuron: troubled translation?** *Cell* **135**:401-406.  
769 <https://doi.org/10.1016/j.cell.2008.10.017>  
770  
771 Kim S, Kim H, Fong N, Erickson B, Bentley DL (2011). **Pre-mRNA splicing is a determinant of**  
772 **histone H3K36 methylation.** *Proceedings of the National Academy of Sciences U S A.*  
773 **108**:13564-13569.  
774 <https://doi.org/10.1073/pnas.1109475108>

- 775 Kino Y, Washizu C, Kurosawa M, Oma Y, Hattori N, Ishiura S, Nukina N (2015). **Nuclear**  
776 **localization of MBNL1: splicing-mediated autoregulation and repression of repeat-derived**  
777 **aberrant proteins.** *Human Molecular Genetics* **24**:740-56.  
778 <https://doi.org/10.1093/hmg/ddu492>  
779
- 780 Kolasinska-Zwierz P, Down T, Latorre I, Liu T, Liu XS, Ahringer J (2009). **Differential chromatin**  
781 **marking of introns and expressed exons by H3K36me3.** *Nature Genetics* **41**:376-381.  
782 <https://doi.org/10.1038/ng.322>  
783
- 784 Konieczny P, Stepniak-Konieczna E, Sobczak K (2014). **MBNL proteins and their target RNAs,**  
785 **interaction and splicing regulation.** *Nucleic Acids Research* **42**:10873-10887.  
786 <https://doi.org/10.1093/nar/gku767>  
787
- 788 Konieczny P, Stepniak-Konieczna E, Sobczak K (2018). **MBNL expression in autoregulatory**  
789 **feedback loops.** *RNA Biology* **15**: 1-8.  
790 <https://doi.org/10.1080/15476286.2017.1384119>  
791
- 792 Korb E, Herre M, Zucker-Scharff I, Gresack J, Allis CD, Darnell RB (2017). **Excess translation**  
793 **of epigenetic regulators contributes to Fragile X Syndrome and is alleviated by Brd4**  
794 **inhibition.** *Cell* **170**:1209-1223.  
795 <https://doi.org/10.1016/j.cell.2017.07.033>  
796
- 797 Li R, Dong Q, Yuan X, Zeng X, Gao Y, Chiao C, et al. (2016). **Misregulation of alternative**  
798 **splicing in a mouse model of Rett syndrome.** *PLoS Genetics* **12**:e100612.  
799 <https://doi.org/10.1371/journal.pgen.1006129>  
800
- 801 Li M, Shin J, Risgaard RD, Parries MJ, Wang J, Chasman D, Liu S, Roy S, Bhattacharyya A,  
802 Zhao X (2020). **Identification of FMR1-regulated molecular networks in human**  
803 **neurodevelopment.** *Genome Research* **30**:361-374.  
804 <https://doi.org/10.1101/gr.251405.119>  
805
- 806 Maurin T, Lebrigand K, Castagnola S, Paquet A, Jarjat M, Popa A, Grossi M, Rage F, Bardoni B.  
807 (2018). **HITS-CLIP in various brain areas reveals new targets and new modalities of RNA**  
808 **binding by fragile X mental retardation protein.** *Nucleic Acids Research* **46**:6344-6355.  
809 <https://doi.org/10.1093/nar/gky267>  
810
- 811 Osterweil EK, Chuang SC, Chubykin AA, Sidorov M, Bianchi R, Wong RK, Bear MF (2013)  
812 **Lovastatin corrects excess protein synthesis and prevents epileptogenesis in a mouse**  
813 **model of fragile X syndrome.** *Neuron* **77**:243-250.  
814 <https://doi.org/10.1016/j.neuron.2012.01.034>  
815
- 816 Parras A, Anta H, Santos-Galindo M, Swarup V, Elorza A, Nieto-González JL, Picó S, Hernández  
817 IH, Díaz-Hernández JI, Belloc E, Rodolosse A, Parikshak NN, Peñagarikano O, Fernández-  
818 Chacón R, Irimia M, Navarro P, Geschwind DH, Méndez R, Lucas JJ (2018). **Autism-like**  
819 **phenotype and risk gene mRNA deadenylation by CPEB4 mis-splicing.** *Nature* **560**:441-446.  
820 <https://doi.org/10.1038/s41586-018-0423-5>  
821
- 822 Paz, I., Kosti, I., Ares Jr, M., Cline, M., & Mandel-Gutfreund, Y. (2014). **RBPmap: a web server**  
823 **for mapping binding sites of RNA-binding proteins.** *Nucleic acids research*, **42**: W361-  
824 W367.  
825 <https://doi.org/10.1093/nar/gku406>



- 826  
827 Pradeepa MM, Sutherland HG, Ule J, Grimes GR, Bickmore WA (2012). **Psip1/Ledgf p52 binds**  
828 **methyated histone H3K36 and splicing factors and contributes to the regulation of**  
829 **alternative splicing.** *PLoS Genetics* **8**:e1002717.  
830 <https://doi.org/10.1371/journal.pgen.1002717>  
831  
832 Richter JD, Collier J (2015). **Pausing on polyribosomes: make way for elongation in**  
833 **translational control.** *Cell* **163**:292-300.  
834 <https://doi.org/10.1016/j.cell.2015.09.041>  
835  
836 Richter JD, Zhao X. (2021) **The molecular biology of FMRP: new insights into fragile X**  
837 **syndrome.** *Nature Reviews Neuroscience* **22**:209-222.  
838 <https://doi.org/10.1038/s41583-021-00432-0>  
839  
840 Santoro MR, Bray SM, Warren ST (2012) **Molecular mechanisms of fragile X syndrome: a**  
841 **twenty-year perspective.** *Annual Review of Pathology* **7**:219-245.  
842 <https://doi.org/10.1146/annurev-pathol-011811-132457>  
843  
844 Sawicka K, Hale CR, Park CY, Fak JJ, Gresack JE, Van Driesche SJ, Kang JJ, Darnell JC, Darnell  
845 RB (2019). **FMRP has a cell-type-specific role in CA1 pyramidal neurons to regulate autism-**  
846 **related transcripts and circadian memory.** *Elife* **8**:e4691.  
847 <https://doi.org/10.7554/eLife.46919>  
848  
849 Schwartz S, Meshorer E, Ast G (2009). **Chromatin organization marks exon-intron structure.**  
850 *Nature Structural and Molecular Biology* **16**:990-995.  
851 <https://doi.org/10.1038/nsmb.1659>  
852  
853 Shah S, Molinaro G, Liu B, Wang R, Huber KM, Richter JD (2020). **FMRP control of ribosome**  
854 **translocation promotes chromatin modifications and alternative splicing of neuronal**  
855 **genes linked to autism.** *Cell Reports* **30**:4459-4472.  
856 <https://doi.org/10.1016/j.celrep.2020.02.076>  
857  
858 Shah S, Richter JD (2021). **Do fragile X syndrome and other intellectual disorders converge**  
859 **at aberrant pre-mRNA splicing?** *Frontiers in Psychiatry* **12**:715346.  
860 <https://doi.org/10.3389/fpsy.2021.715346>  
861  
862 Shen, S., Park, J.W., Lu, Z., Lin, L., Henry, M.D., Wu, Y.N., Zhou, Q., and Xing, Y. (2014). **rMATS:**  
863 **Robust and flexible detection of differential alternative splicing from replicate RNA-Seq**  
864 **data.** *Proc. Natl. Acad. Sci.* **111**, E5593-E5601.  
865 <https://doi.org/10.1073/pnas.1419161111>  
866  
867 Shu H, Donnard E, Liu B, Jung S, Wang R, Richter JD (2020). **FMRP links optimal codons to**  
868 **mRNA stability in neurons.** *Proceedings of the National Academy of Sciences U S A.*  
869 **117**:30400-30411.  
870 <https://doi.org/10.1073/pnas.2009161117>  
871  
872 Spector DL, Lamond AI (2011). **Nuclear speckles.** *Cold Spring Harbor Perspectives in Biology*  
873 **3**:a000646.  
874 <https://doi.org/10.1101/cshperspect.a000646>  
875

- 876 Stefani G, Fraser CE, Darnell JC, Darnell RB (2004). **Fragile X mental retardation protein is**  
877 **associated with translating polyribosomes in neuronal cells.** *Journal of Neuroscience*  
878 **24:7272-7276.**  
879 <https://doi.org/10.1523/JNEUROSCI.2306-04.2004>  
880
- 881 Tamanini F, Bontekoe C, Bakker CE, van Unen L, Anar B, Willemsen R, Yoshida M, Galjaard H,  
882 Oostra BA, Hoogeveen AT (1999). **Different targets for the fragile X-related proteins revealed**  
883 **by their distinct nuclear localizations.** *Human Molecular Genetics* **8:863-869.**  
884 <https://doi.org/10.1093/hmg/8.5.863>  
885
- 886 Tapial J, Ha KCH, Sterne-Weiler T, Gohr A, Braunschweig U, Hermoso-Pulido A, Quesnel-  
887 Vallières M, Permanyer J, Sodaei R, Marquez Y, Cozzuto L, Wang X, Gómez-Velázquez M,  
888 Rayon T, Manzanares M, Ponomarenko J, Blencowe BJ, Irimia M (2017). **An atlas of alternative**  
889 **splicing profiles and functional associations reveals new regulatory programs and genes**  
890 **that simultaneously express multiple major isoforms.** *Genome Research* **27:1759-1768.**  
891 <https://doi.org/10.1101/gr.220962.117>  
892
- 893 Terenzi F, Ladd AN. (2010) **Conserved developmental alternative splicing of muscleblind-**  
894 **like (MBNL) transcripts regulates MBNL localization and activity.** *RNA Biology* **7:43-55.**  
895 <https://doi.org/10.4161/rna.7.1.10401>  
896
- 897 Thacker S, Sefyi M, Eng C (2020). **Alternative splicing landscape of the neural transcriptome**  
898 **in a cytoplasmic-predominant Pten expression murine model of autism-like behavior.**  
899 *Translational Psychiatry* **10:380.**  
900 <https://doi.org/10.1038/s41398-020-01068-x>  
901
- 902 Tran SS, Jun HI, Bahn JH, Azghadi A, Ramaswami G, Van Nostrand EL, Nguyen TB, Hsiao YE,  
903 Lee C, Pratt GA, Martínez-Cerdeño V, Hagerman RJ, Yeo GW, Geschwind DH, Xiao X (2019).  
904 **Widespread RNA editing dysregulation in brains from autistic individuals.** *Nature*  
905 *Neuroscience* **22:25-36.**  
906 <https://doi.org/10.1038/s41593-018-0287-x>  
907
- 908 Tran H, Gourrier N, Lemerrier-Neuillet C, Dhaenens CM, Vautrin A, Fernandez-Gomez FJ,  
909 Arandel L, Carpentier C, Obriot H, Eddarkaoui S, Delattre L, Van Brussels E, Holt I, Morris GE,  
910 Sablonnière B, Buée L, Charlet-Berguerand N, Schraen-Maschke S, Furling D, Behm-Ansmant I,  
911 Branlant C, Caillet-Boudin ML, Sergeant N (2011). **Analysis of exonic regions involved in**  
912 **nuclear localization, splicing activity, and dimerization of Muscleblind-like-1 isoforms.**  
913 *Journal of Biological Chemistry* **286:16435-16446.**  
914 <https://doi.org/10.1074/jbc.M110.194928>  
915
- 916 Udagawa T, Farny NG, Jakovcevski M, Kaphzan H, Alarcon JM, Anilkumar S, Ivshina M, Hurt JA,  
917 Nagaoka K, Nalavadi VC, Lorenz LJ, Bassell GJ, Akbarian S, Chattarji S, Klann E, Richter JD  
918 (2013). **Genetic and acute CPEB1 depletion ameliorate fragile X pathophysiology.** *Nature*  
919 *Medicine* **19:1473-1477.**  
920 <https://doi.org/10.1038/nm.3353>  
921
- 922 Wu T, Hu E, Xu S, Chen M, Guo P, Dai Z, Feng T, Zhou L, Tang W, Zhan L, Fu x, Liu S, Bo X,  
923 Yu G (2021). **“clusterProfiler 4.0: A universal enrichment tool for interpreting omics**  
924 **data.”** *The Innovation*, **2(3)**, 100141.  
925 <https://doi.org/10.1016/j.xinn.2021.100141>  
926

- 927 Yu G, Wang L, Han Y, He Q (2012). “**clusterProfiler: an R package for comparing biological**  
928 **themes among gene clusters.**” *OMICS: A Journal of Integrative Biology*, 16(5), 284-287.  
929 <https://doi.org/10.1089/omi.2011.0118>  
930
- 931 Yukselen O, Turkyilmaz O, Ozturk AR, Garber M, Kucukural A (2020). **DolphinNext: a**  
932 **distributed data processing platform for high throughput genomics.** *BMC Genomics*.  
933 **21:310.**  
934 <https://doi.org/10.1186/s12864-020-6714-x>  
935  
936  
937

938  
939  
940  
941  
942  
943  
944  
945  
946  
947  
948  
949  
950  
951  
952  
953  
954  
955  
956  
957  
958  
959  
960  
961

## Additional files

**Supplementary file 1.** RNA-seq analysis of gene expression in WT and *Fmr1* KO mice and siNT and siFmr1 treated N2A cells.

Differential gene expression analysis of WT and *Fmr1* KO tissues from CTX, HC, CB, LV, MU, TE and N2A cells.

**Supplementary file 2.** Alternative splicing events in WT and *Fmr1* KO mice cortex (CTX).

**Supplementary file 3.** Alternative splicing events in WT and *Fmr1* KO mice hippocampus (HC).

**Supplementary file 4.** Alternative splicing events in WT and *Fmr1* KO mice cerebellum (CB).

**Supplementary file 5.** Alternative splicing events in WT and *Fmr1* KO mice liver (LV).

**Supplementary file 6.** Alternative splicing events in WT and *Fmr1* KO mice muscle (MU).

**Supplementary file 7.** Alternative splicing events in WT and *Fmr1* KO mice testis (TE).

**Supplementary file 8.** Alternative splicing events in siNT and siFmr1 treated N2A cells.

**Supplementary file 9.** MBNL1 binding motif analysis in N2A cells.
